# Supplementary material for: Reference intervals for 33 biochemical analytes in healthy Indian population: C-RIDL IFCC initiative
Source: publisher site journal article supplement (doi:10.1515/cclm-2018-0152), 2018-08-03

TP g/dL

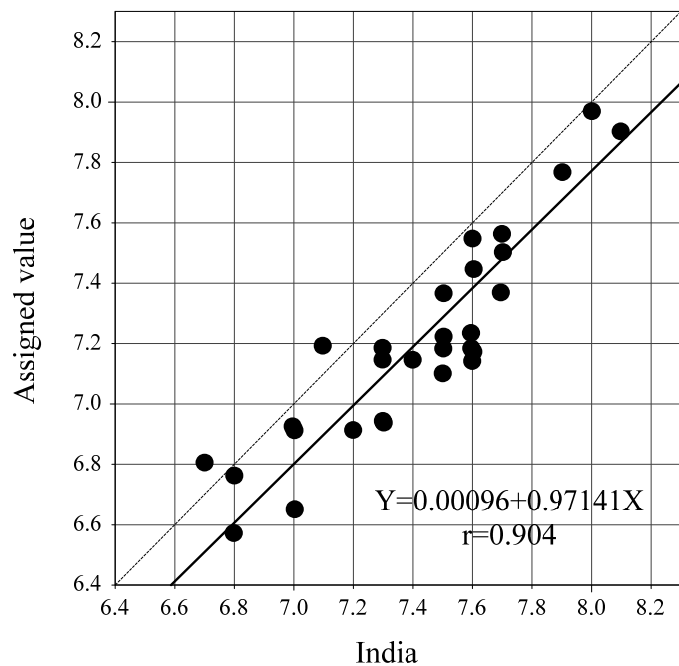

UN mg/dL

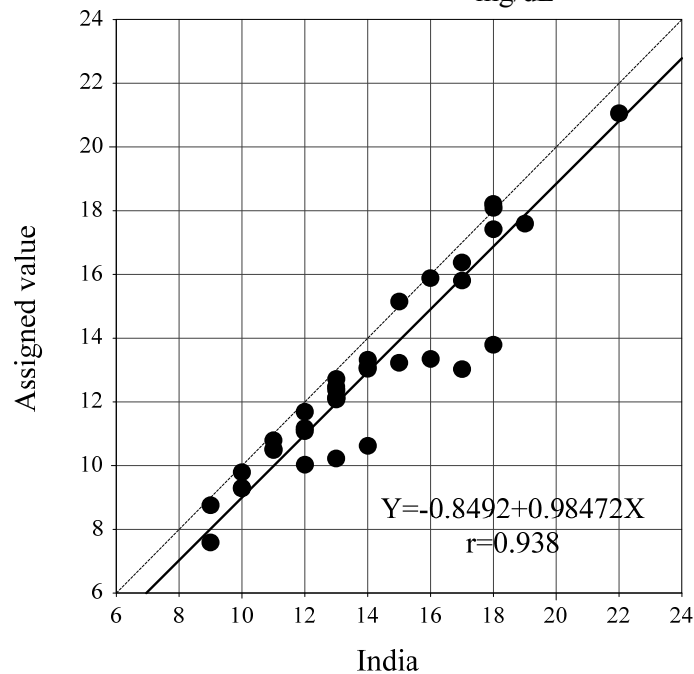

UA mg/dL

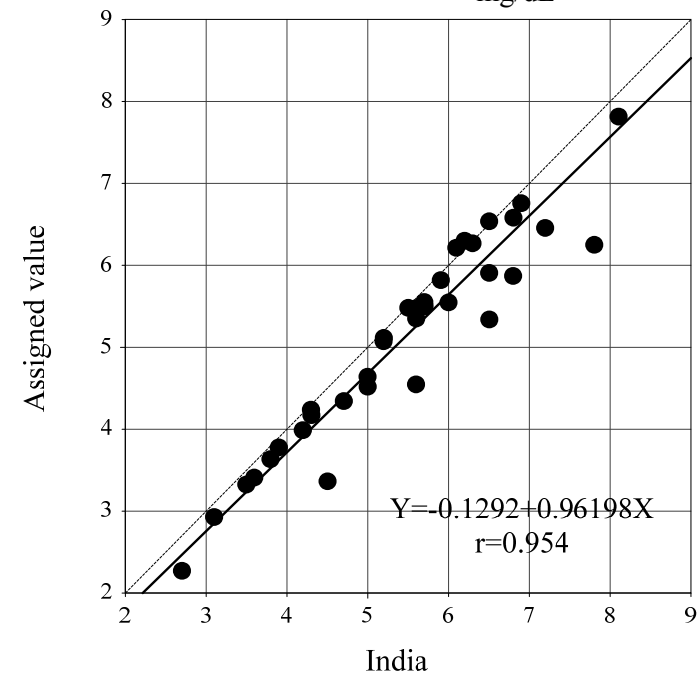

CRE mg/dL

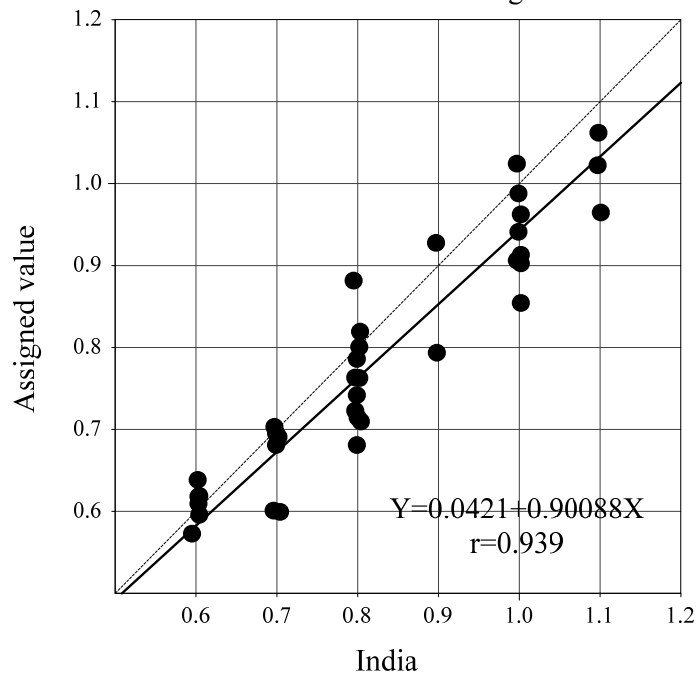

TBil mg/dL

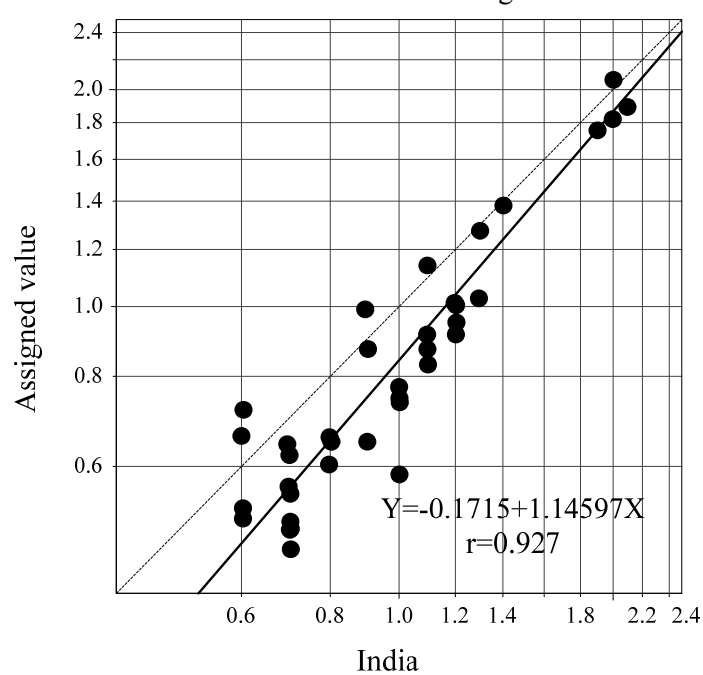

Glu mg/dL

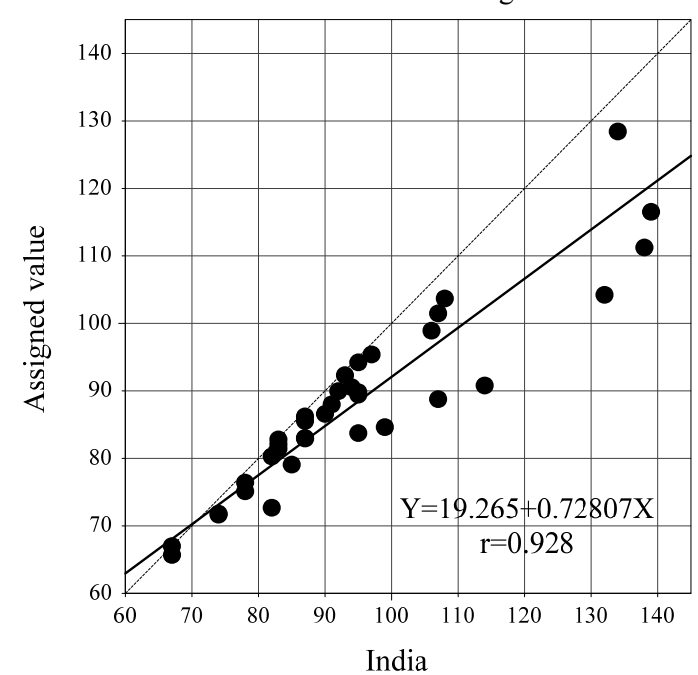

TC mg/dL

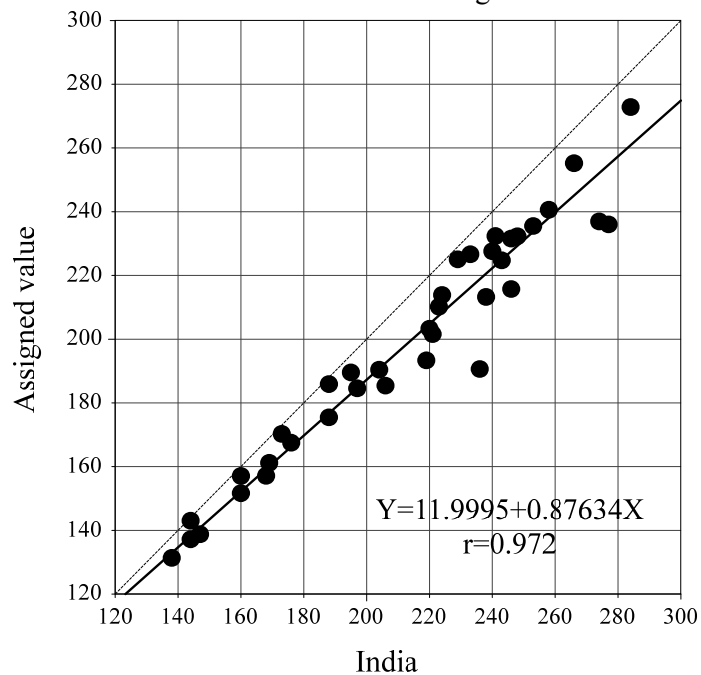

TG mg/dL

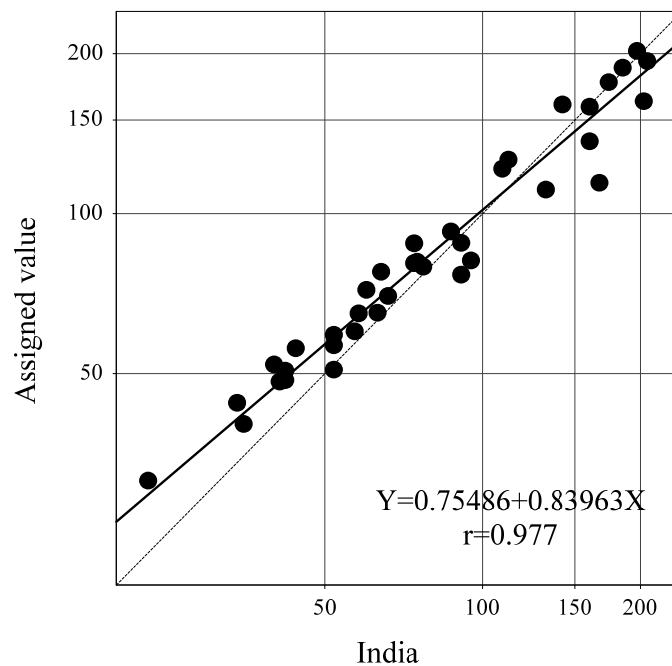

HDL-C mg/dL

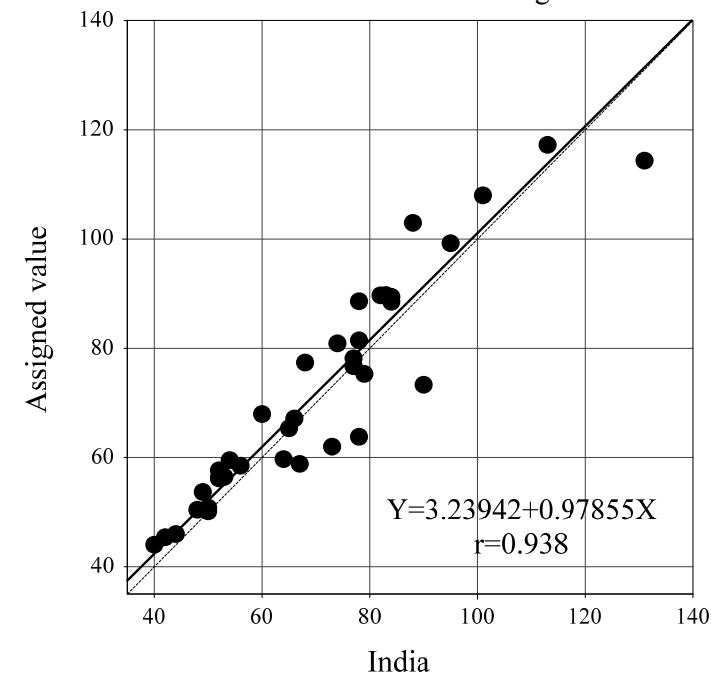

LDL-C mg/dL

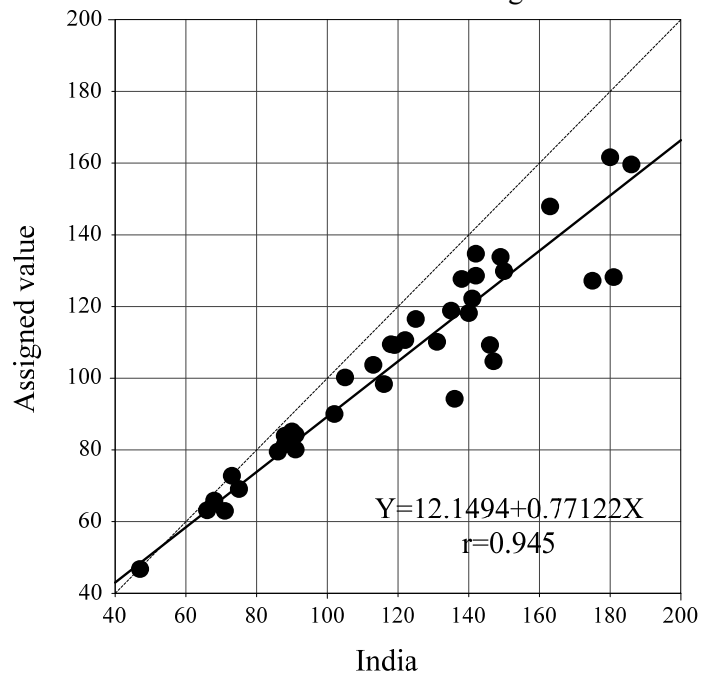

Na mmol/L

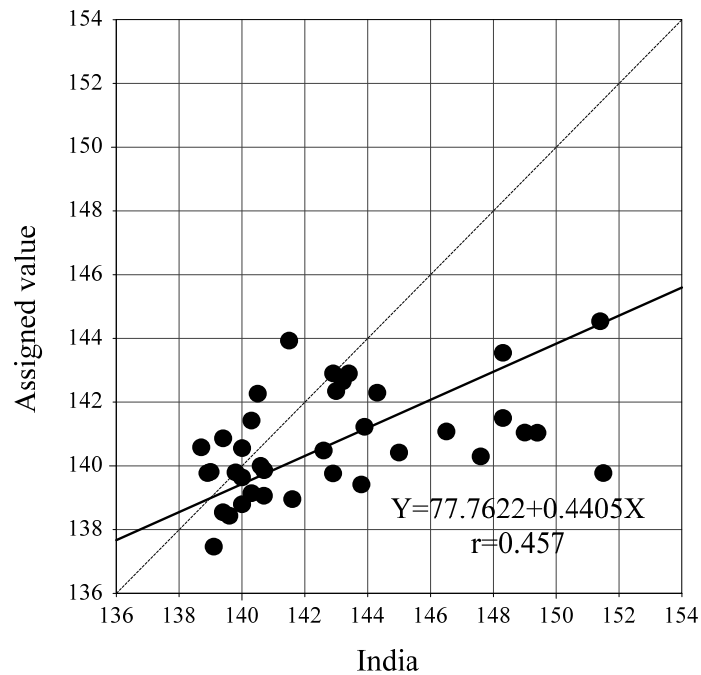

K mmol/L

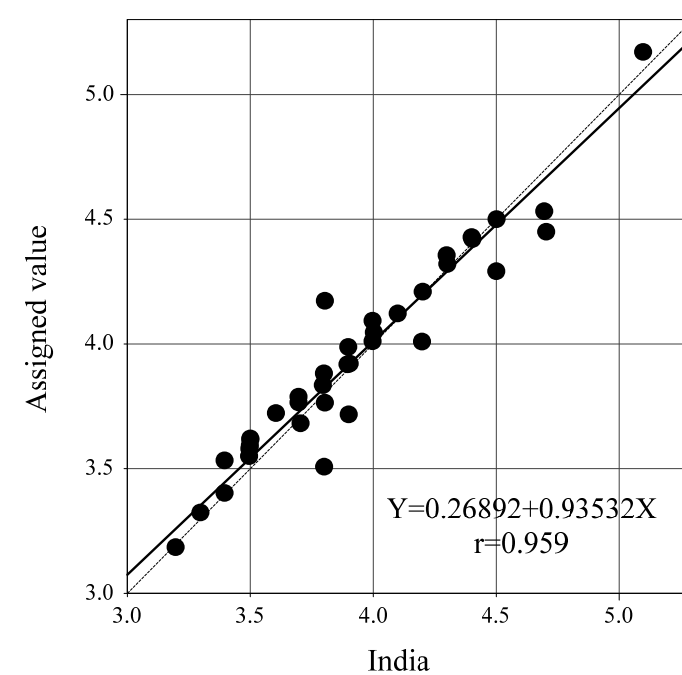

C1 mmol/L

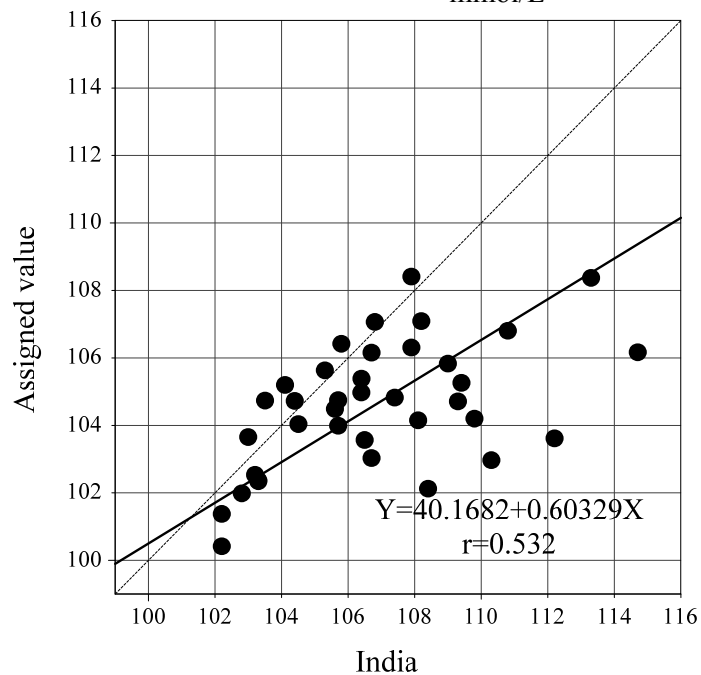

Ca mg/dL

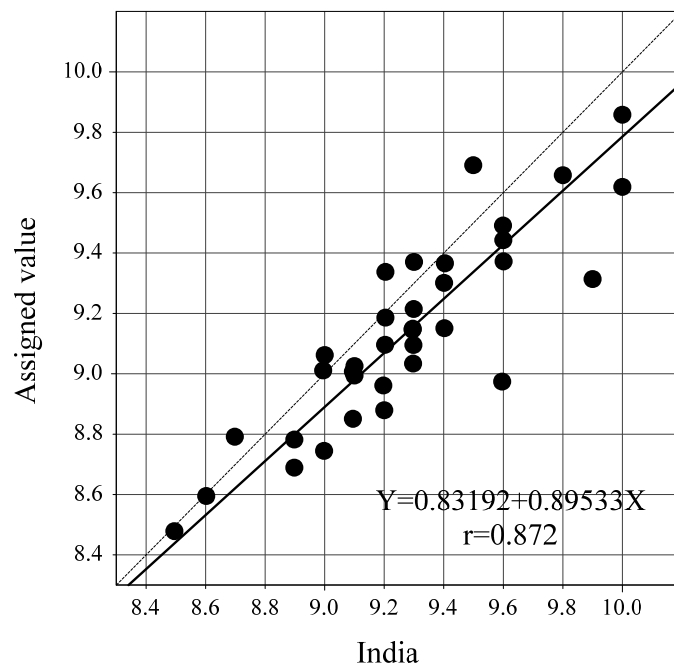

IP mg/dL

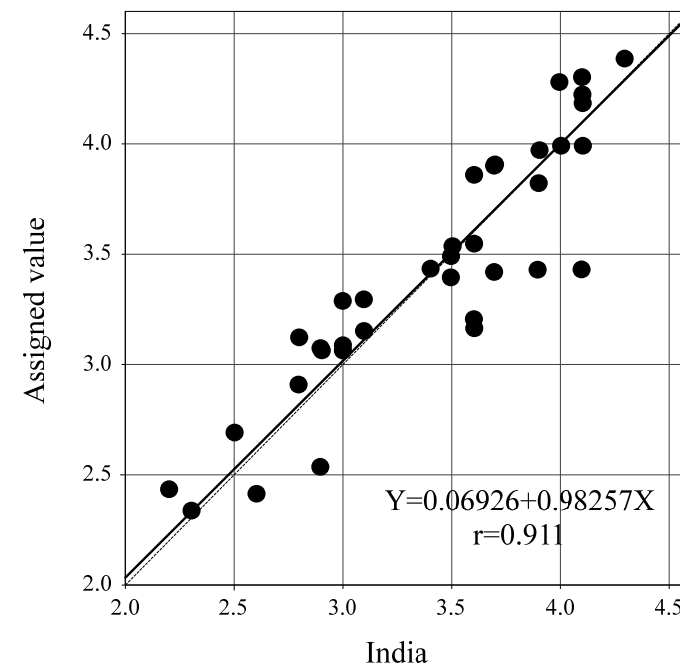

GGT U/L

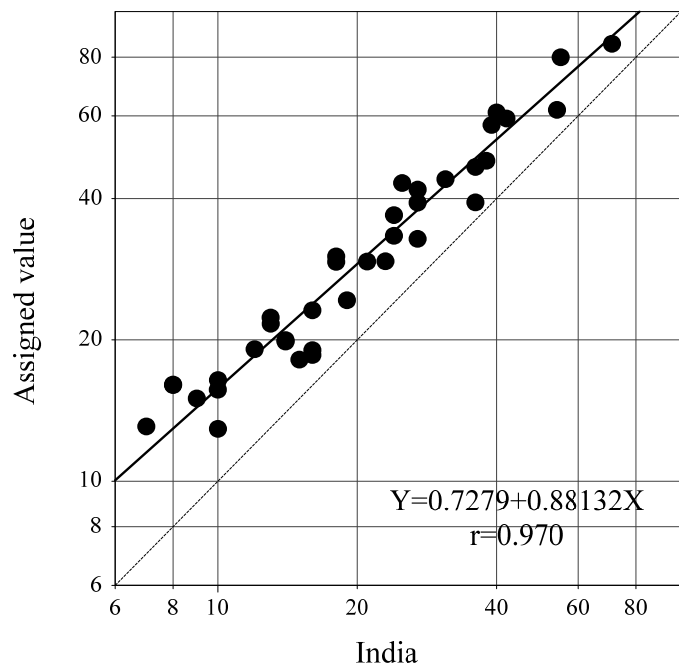

AST U/L

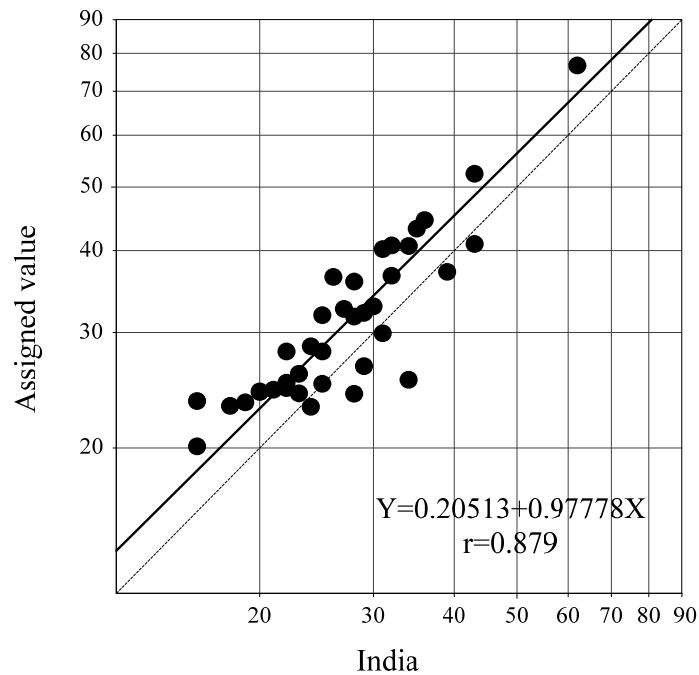

ALT U/L

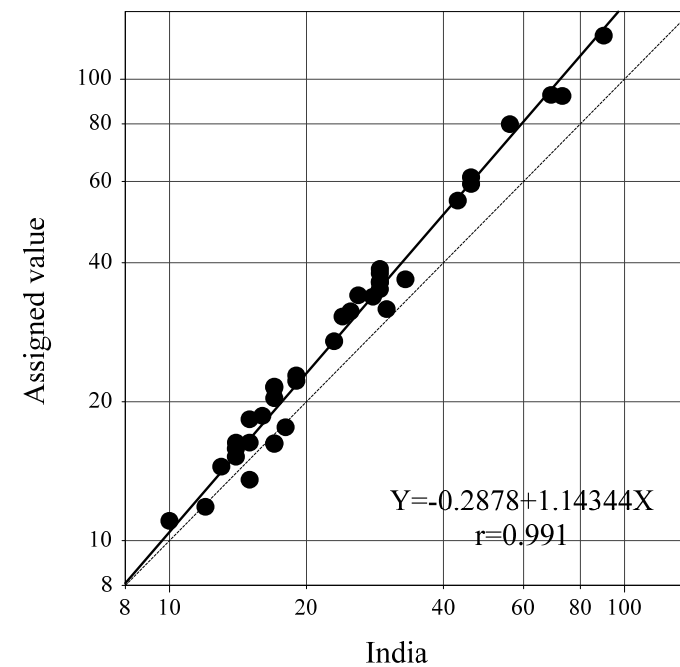

CK U/L

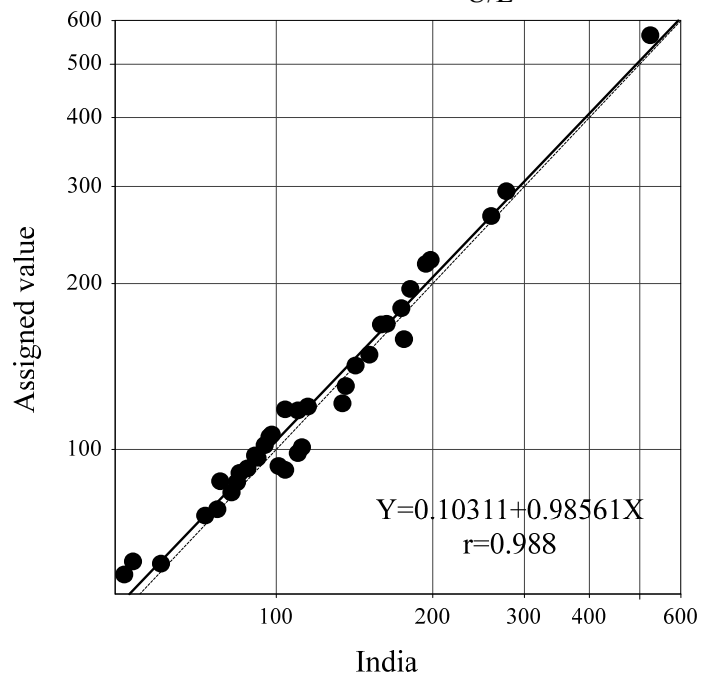

CRP mg/dL

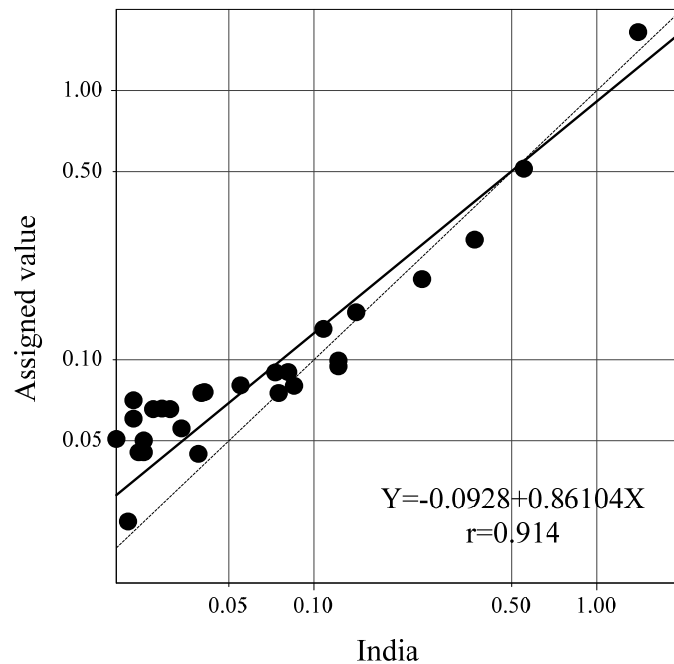

IgG mg/dL

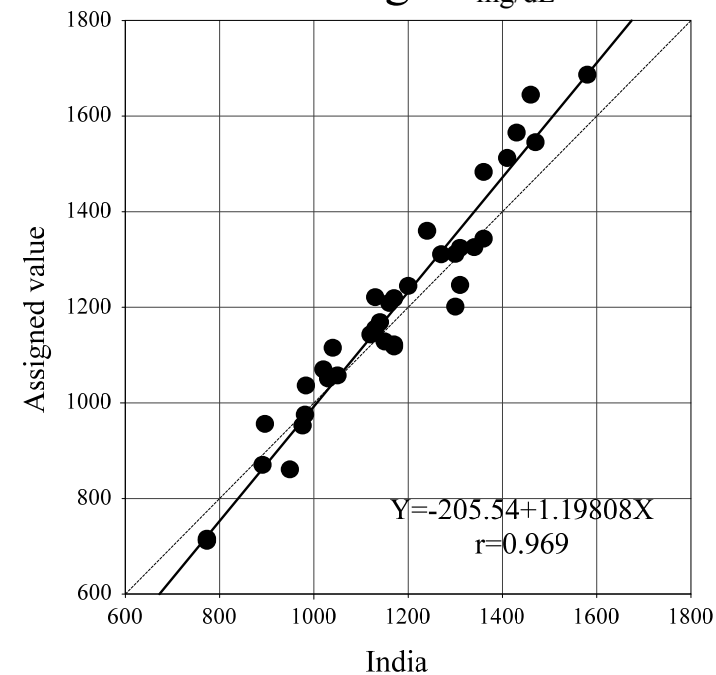

IgA mg/dL

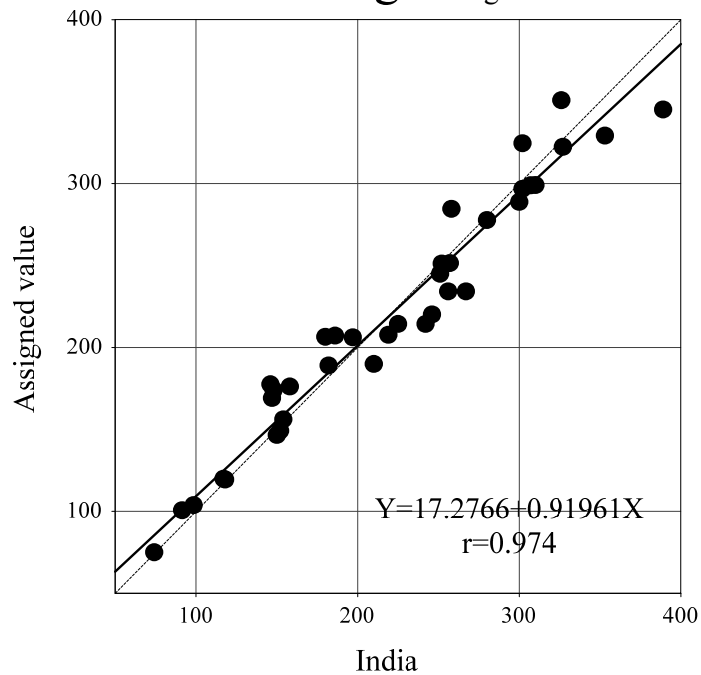

IgM mg/dL

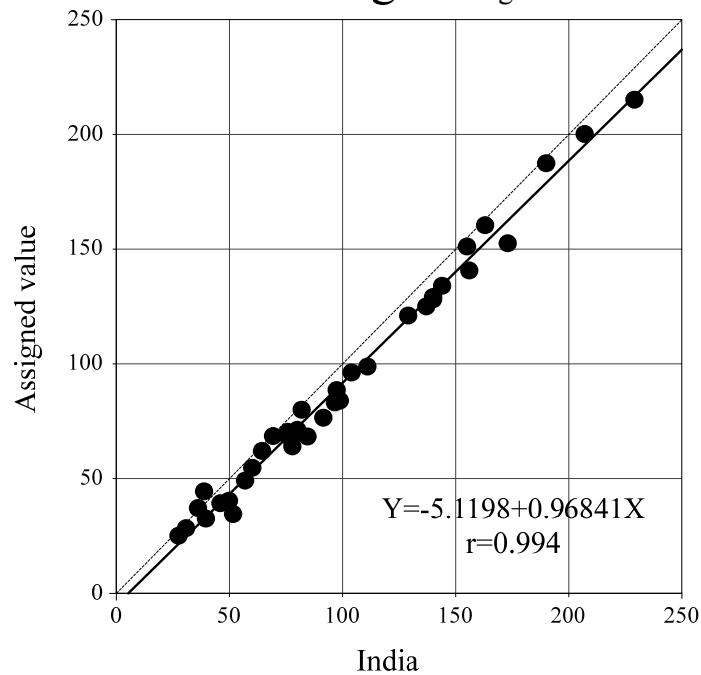

C3 mg/dL

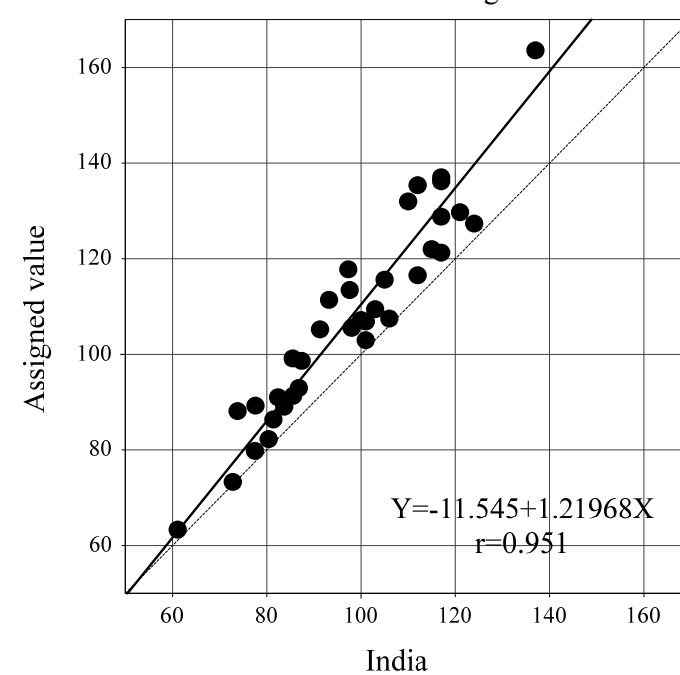

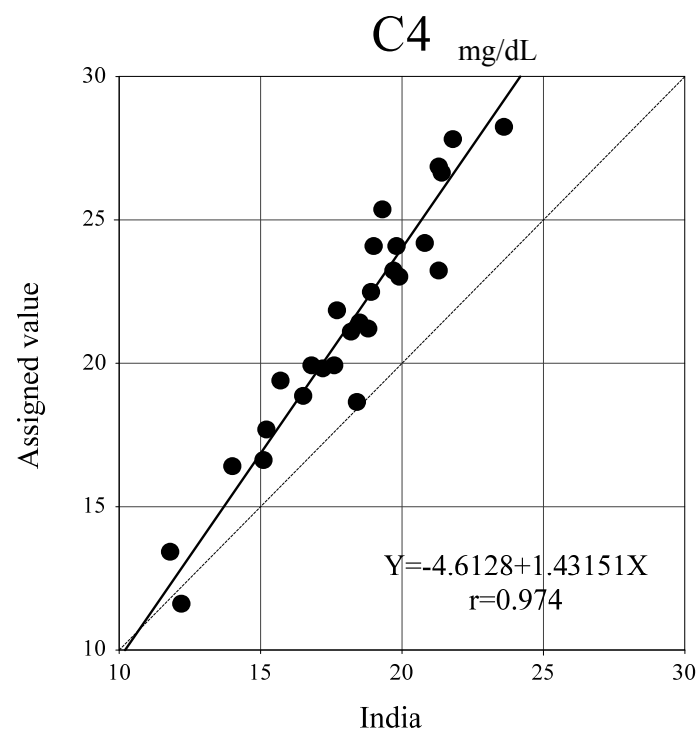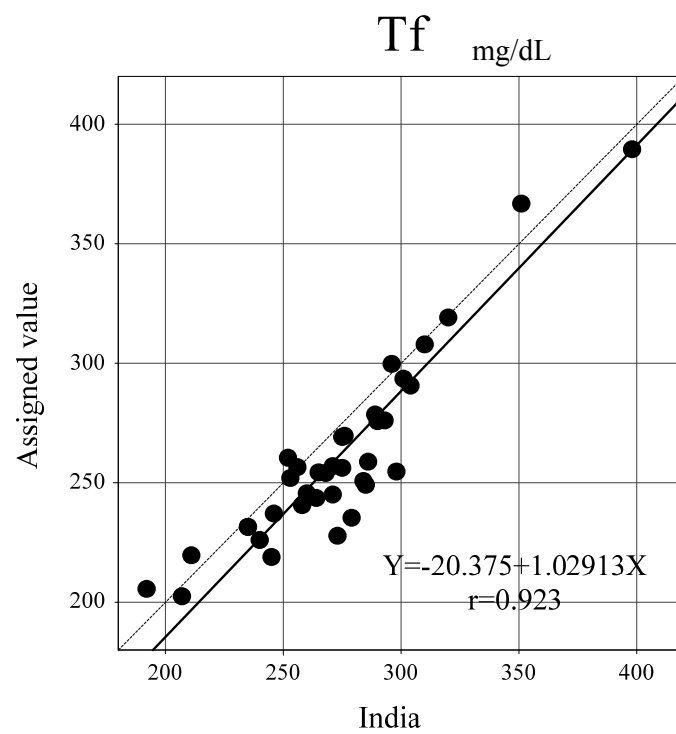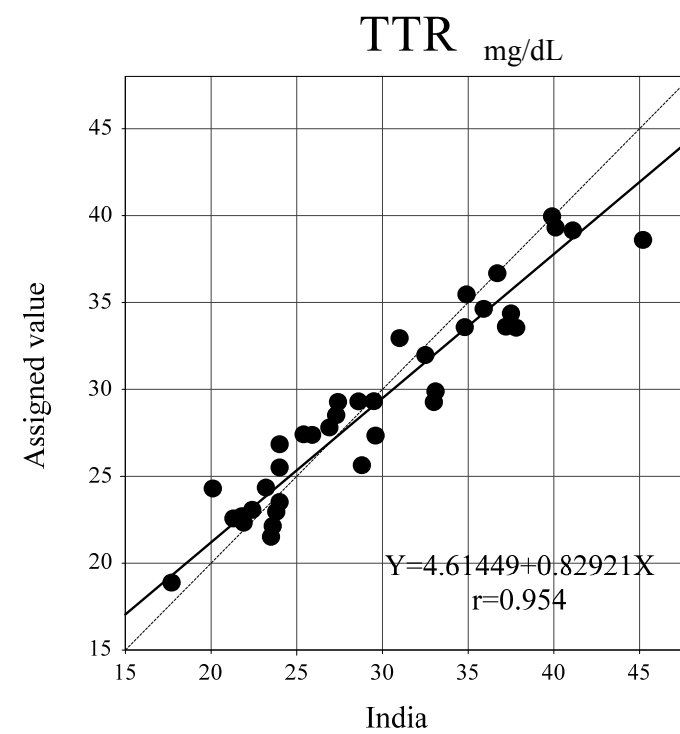

Supplement: Supplementary file 2 [file cclm-2018-0152_suppl.zip]
