# Supplementary material for: Reference intervals for 33 biochemical analytes in healthy Indian population: C-RIDL IFCC initiative
Source: publisher site journal article supplement (doi:10.1515/cclm-2018-0152), 2018-08-03

# Suppl Figure 1: Sex and age-related changes in RVs

SDR<sub>age</sub> was computed for each sex by one-way ANOVA

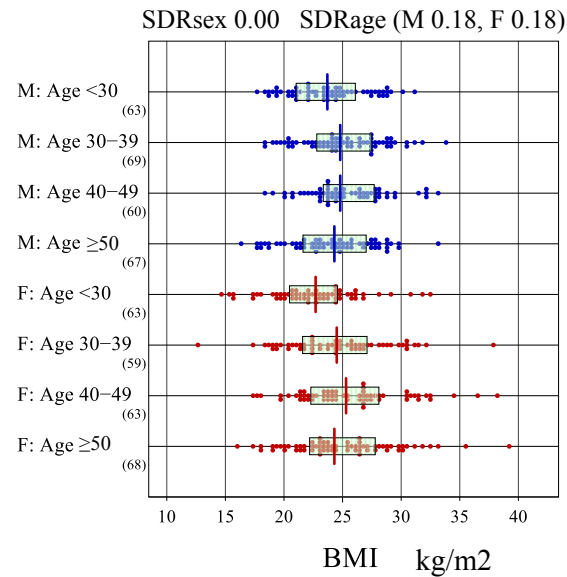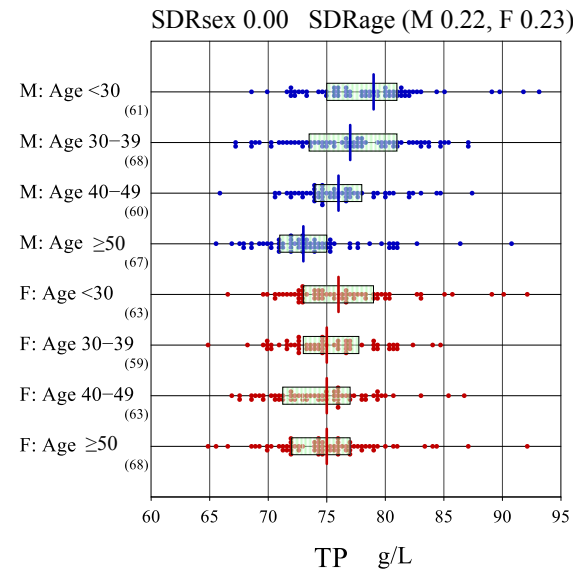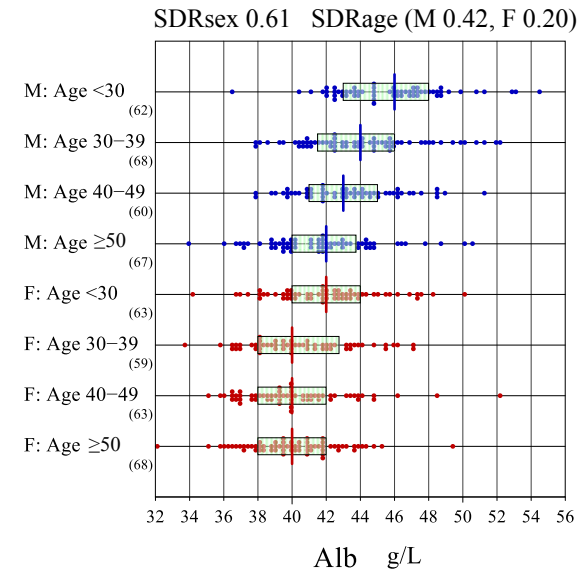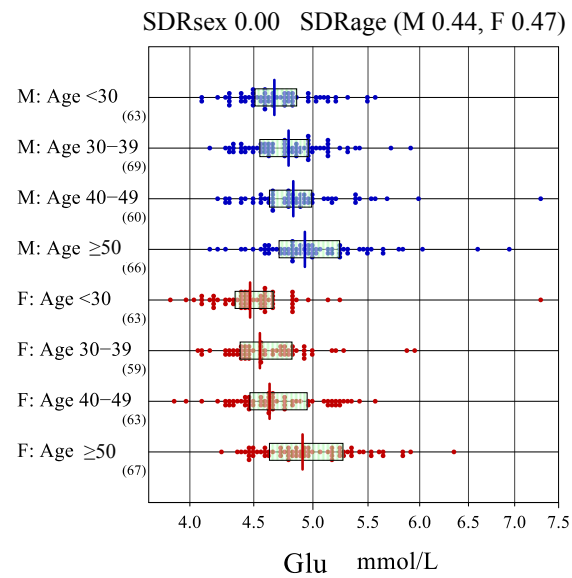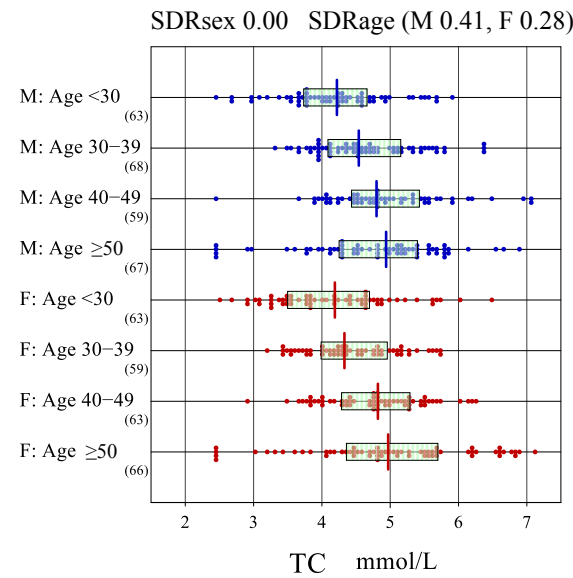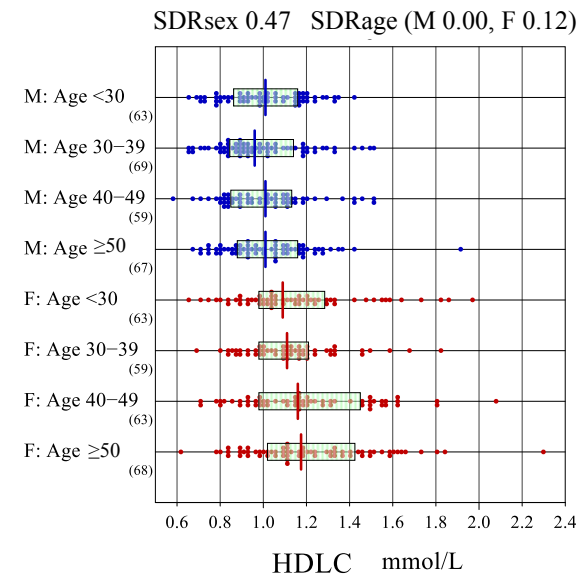

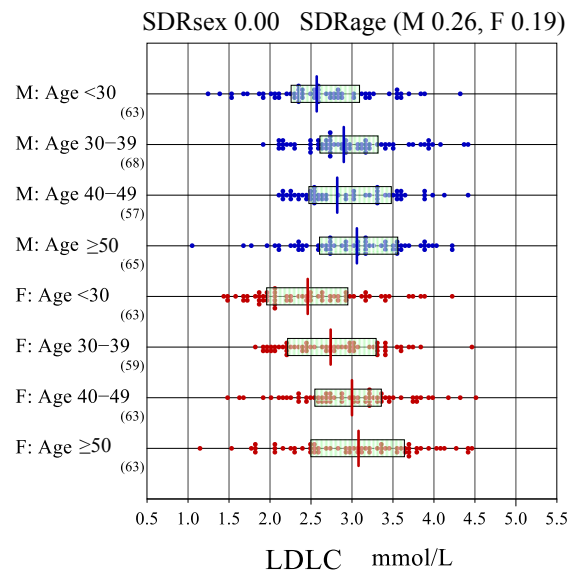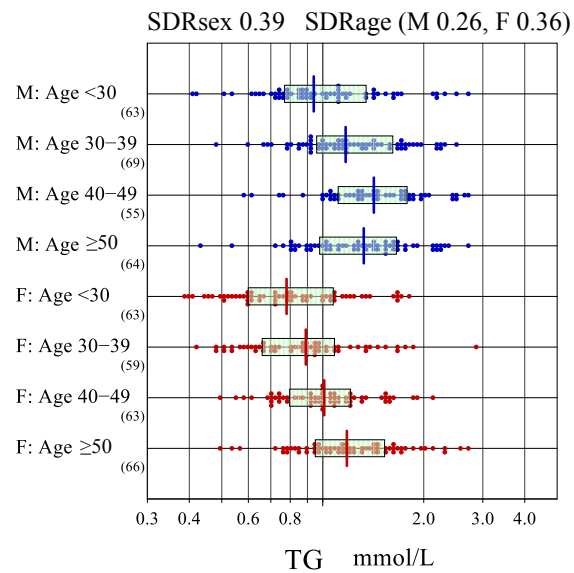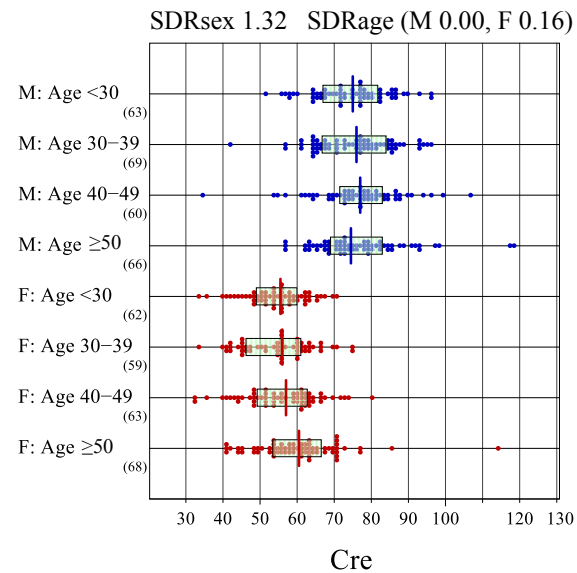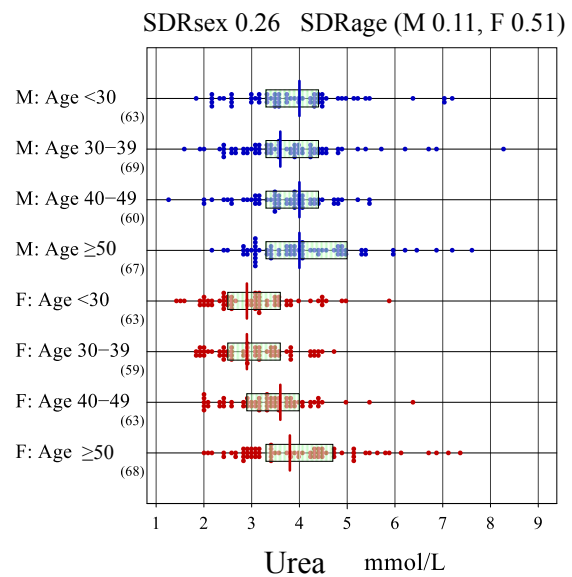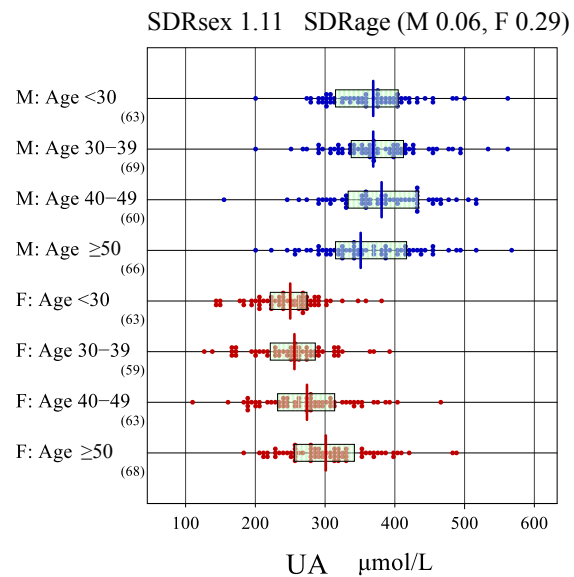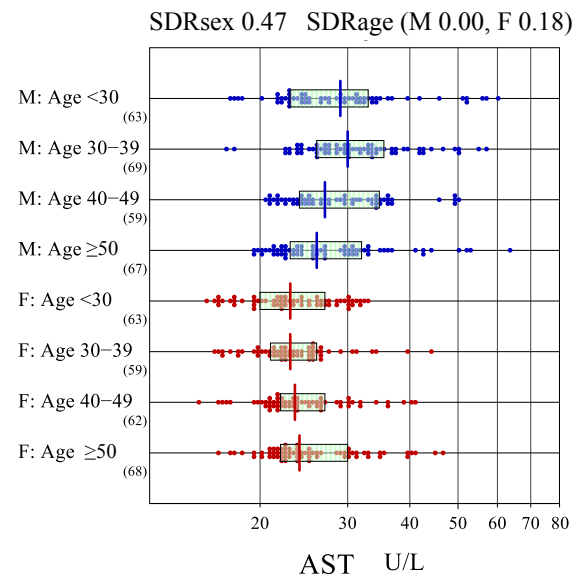

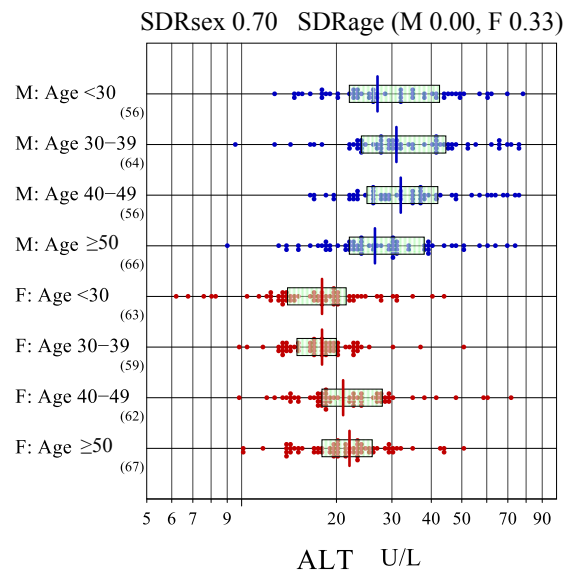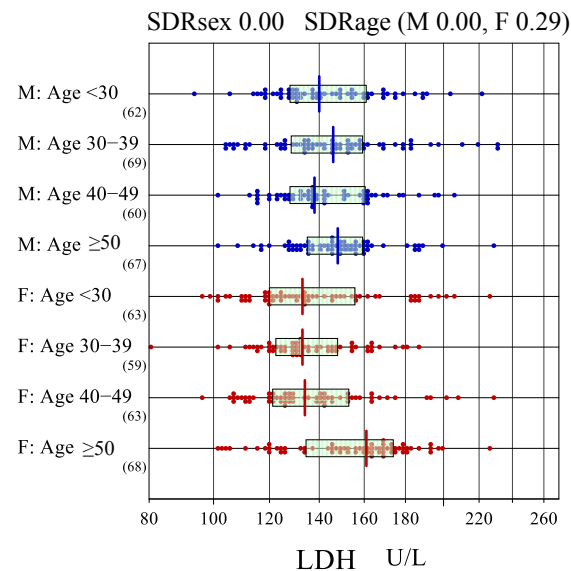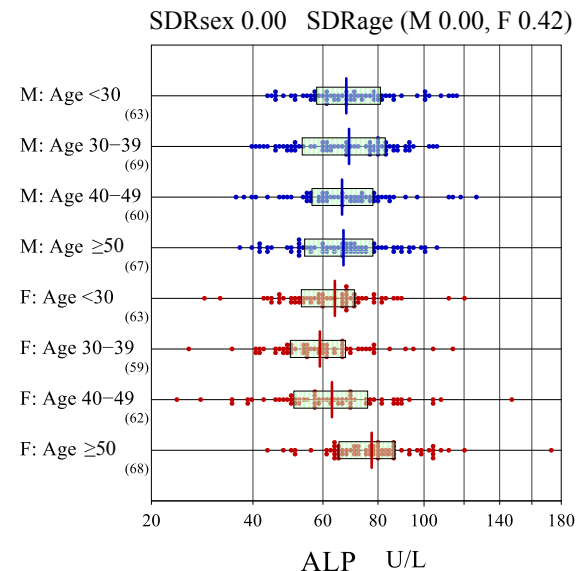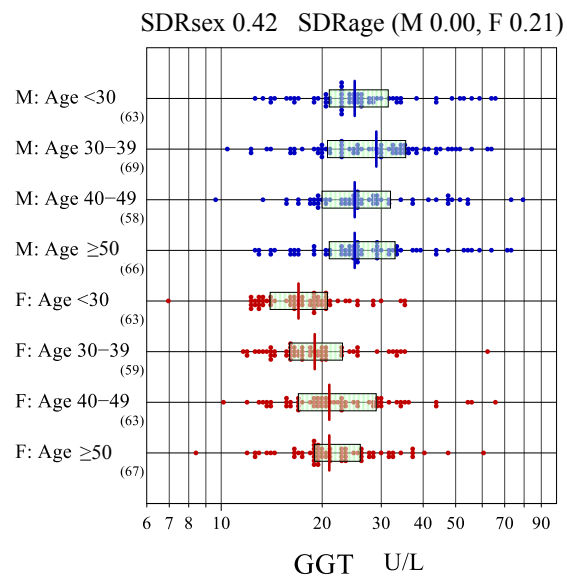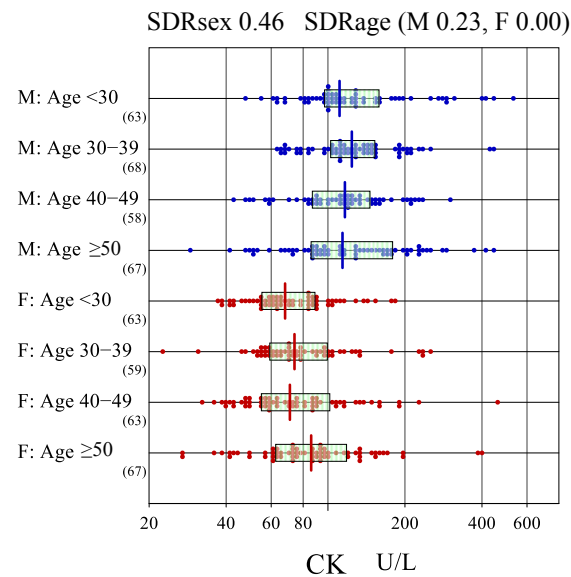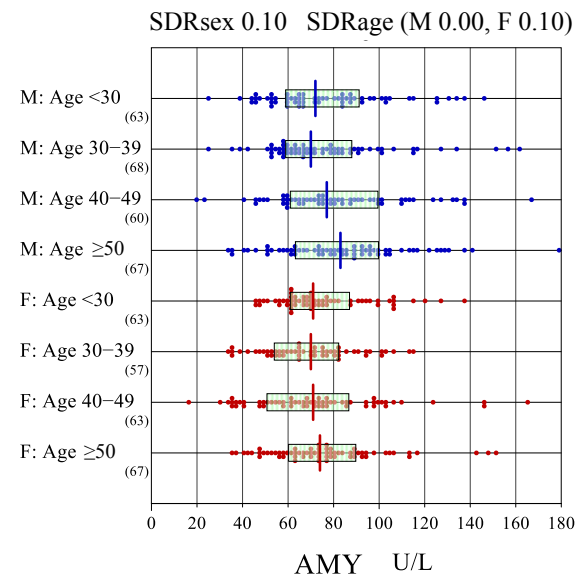

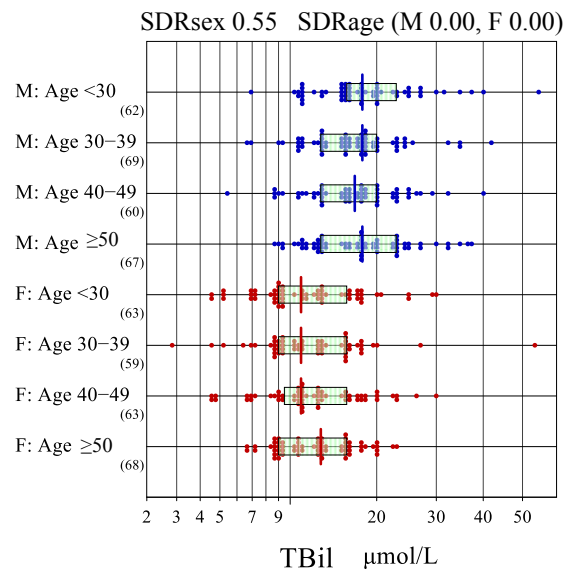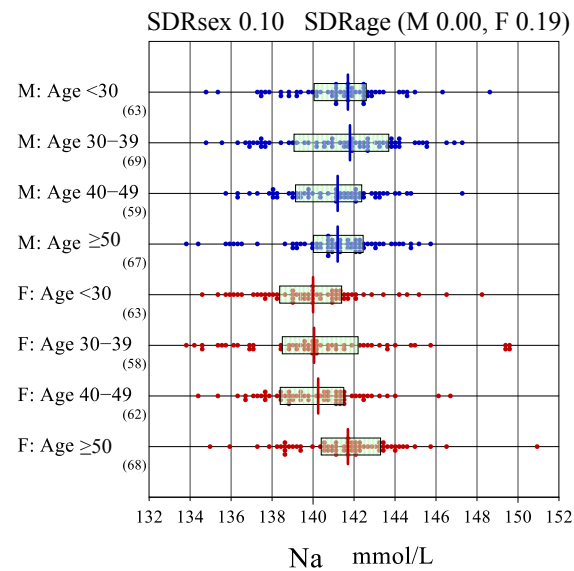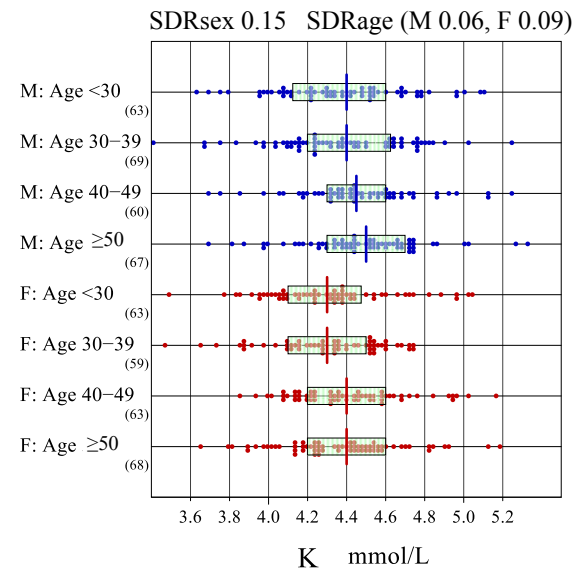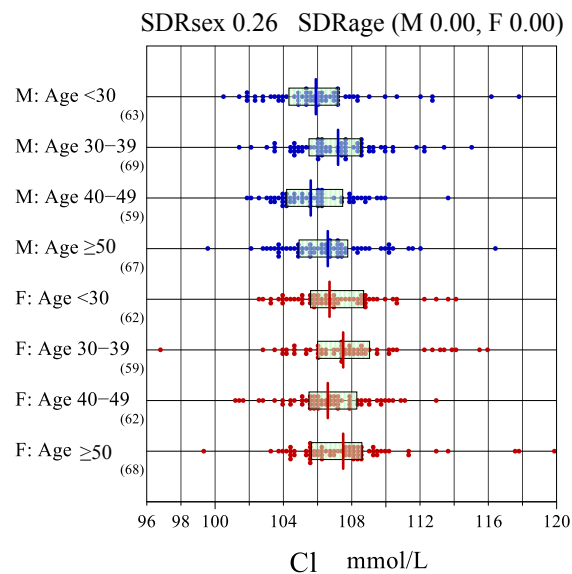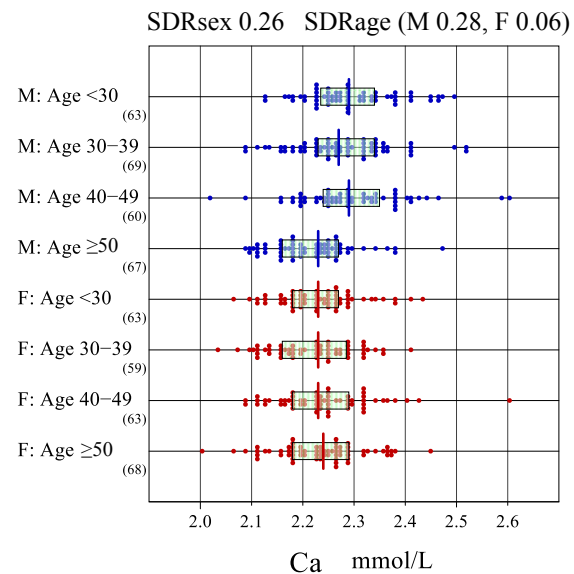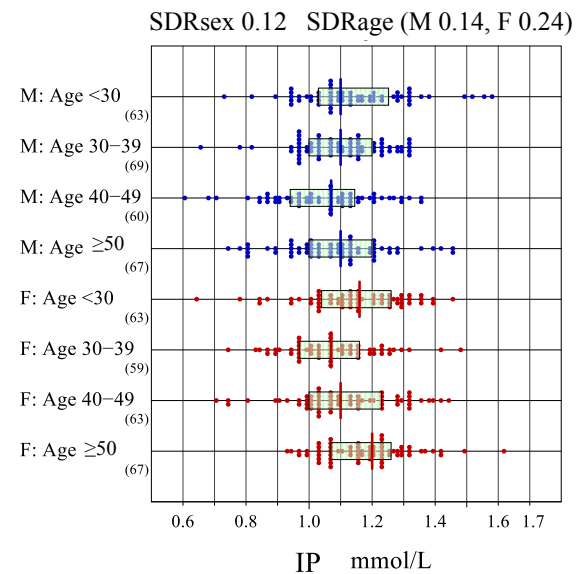

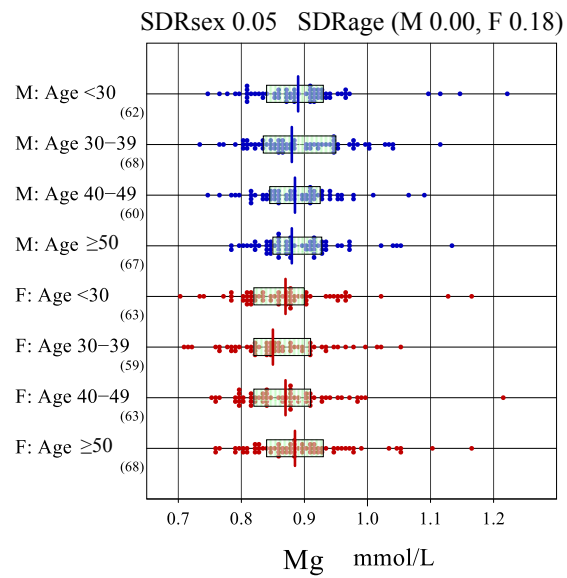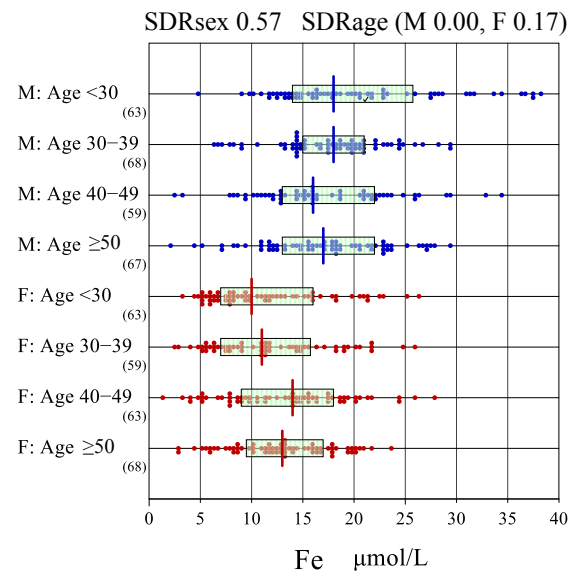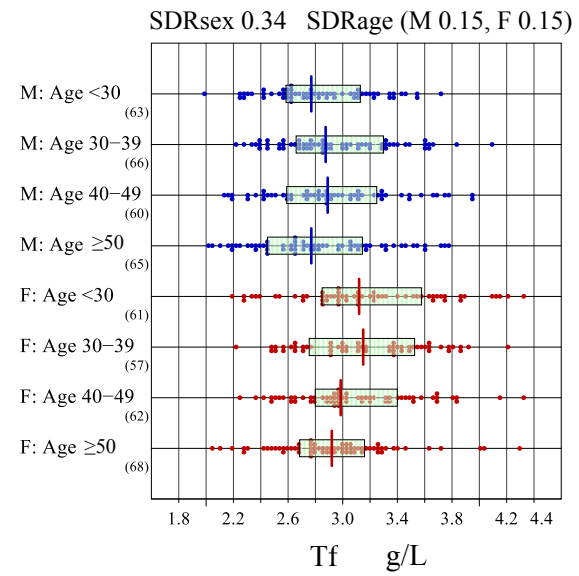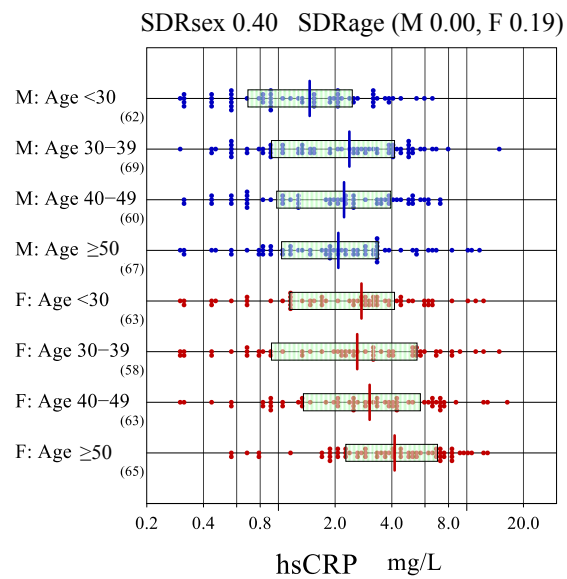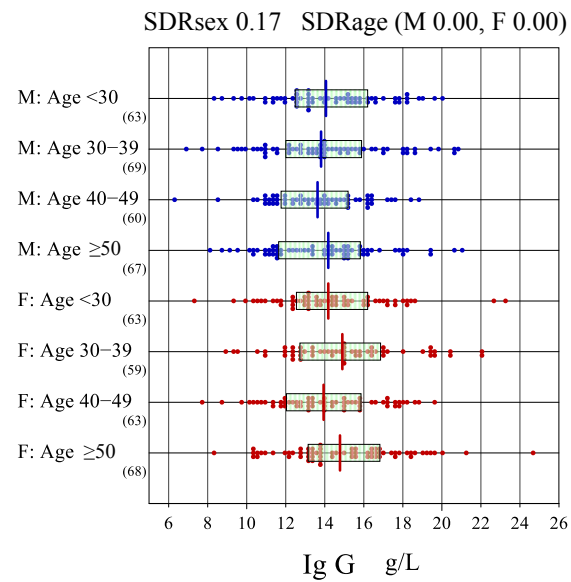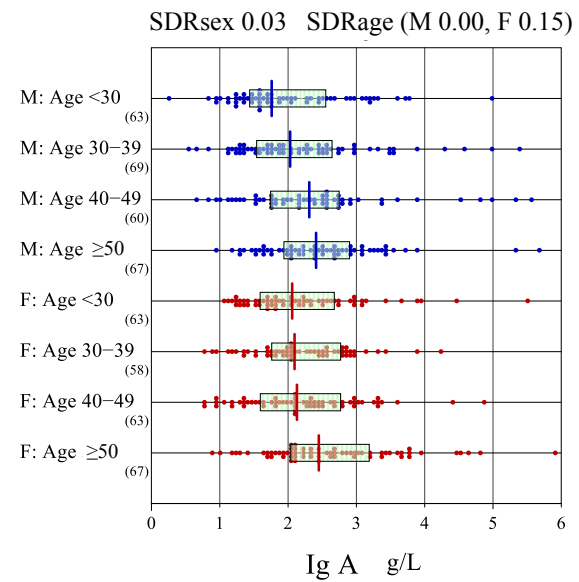

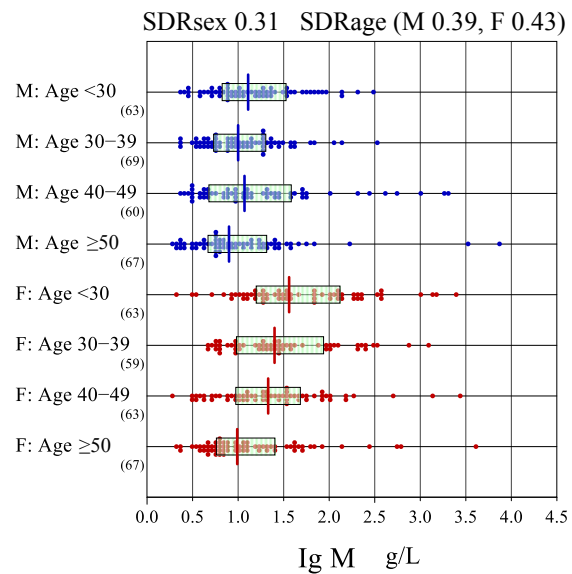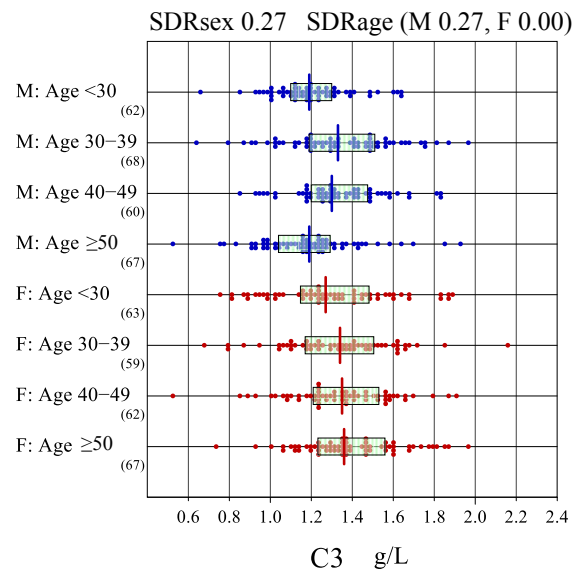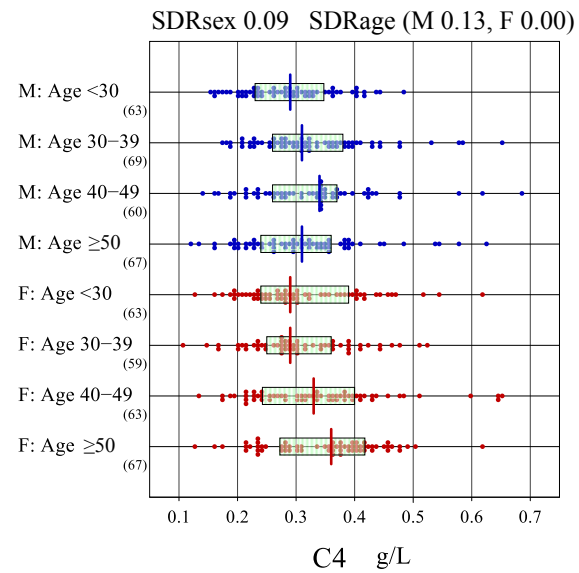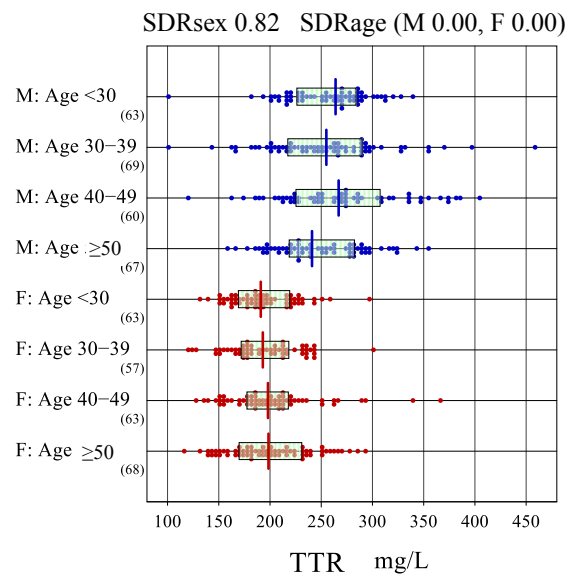

## Suppl Figure 2: BMI-related changes in RVs

$SDR_{BMI}$  was adjusted for age-related changes by including age as a covariate in 2-level nested ANOVA

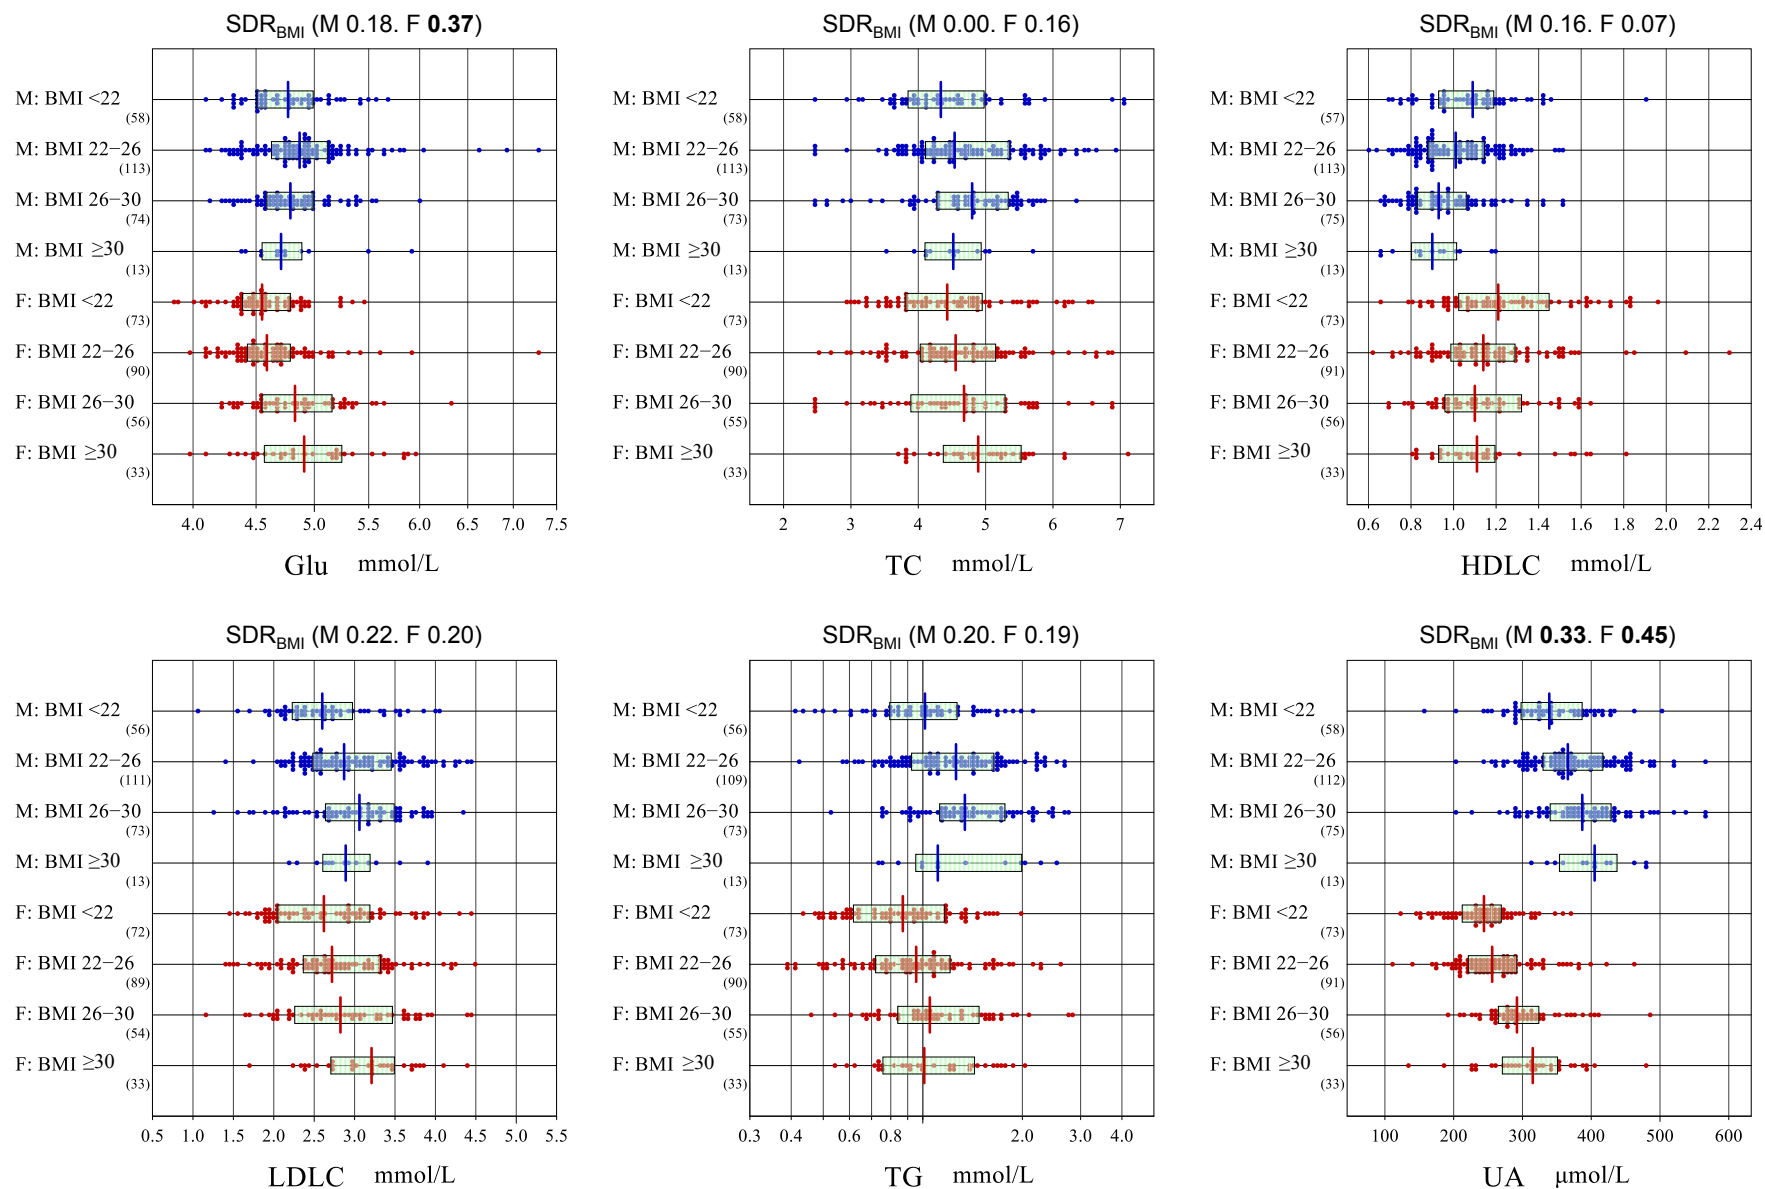

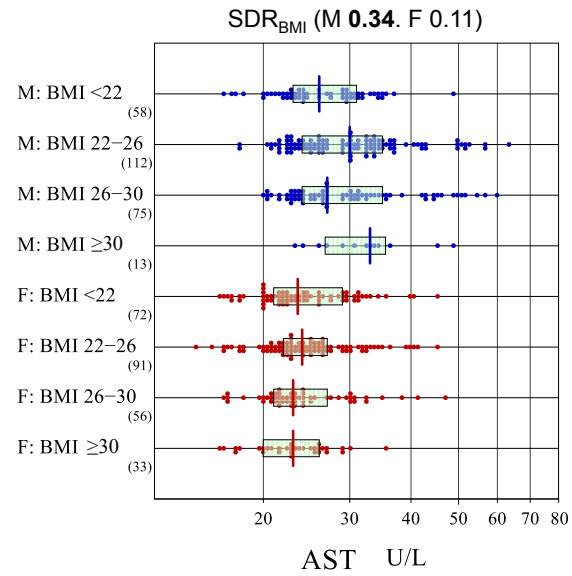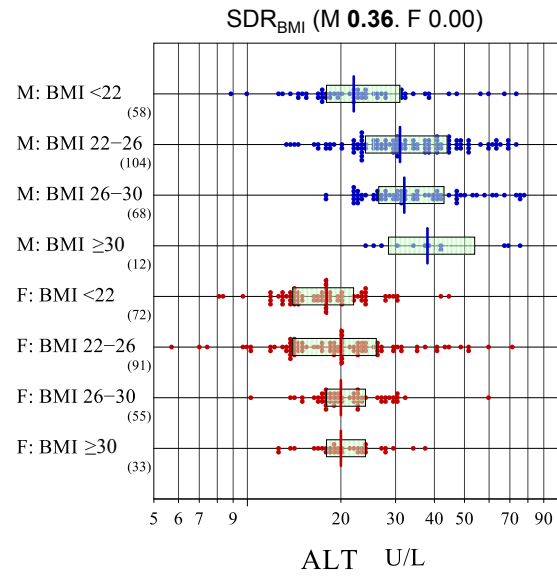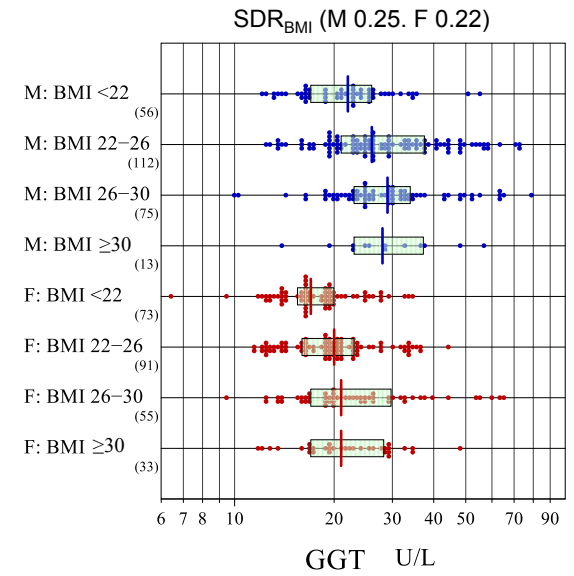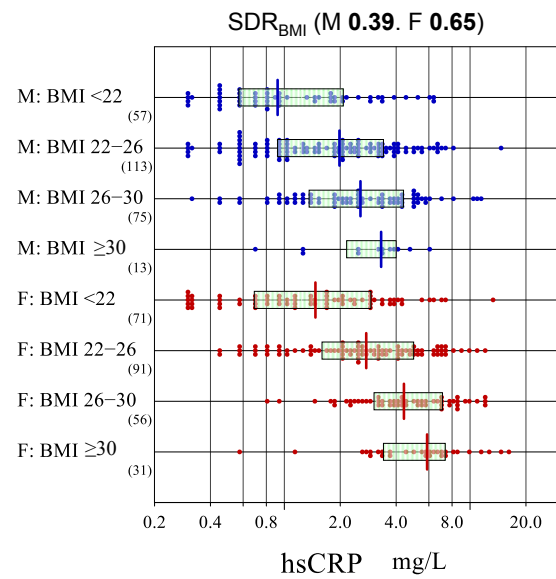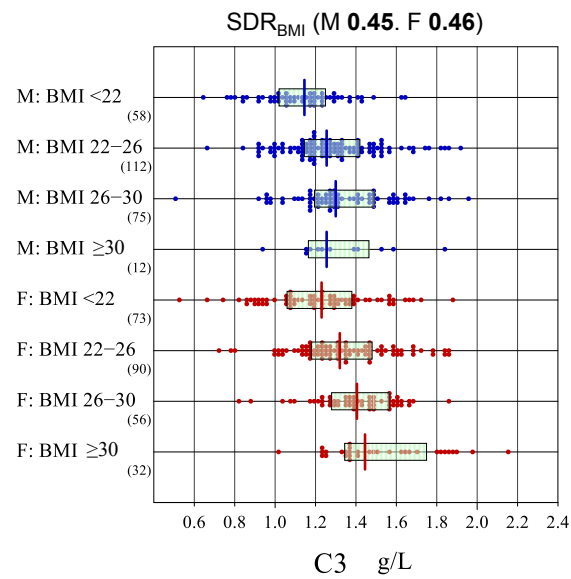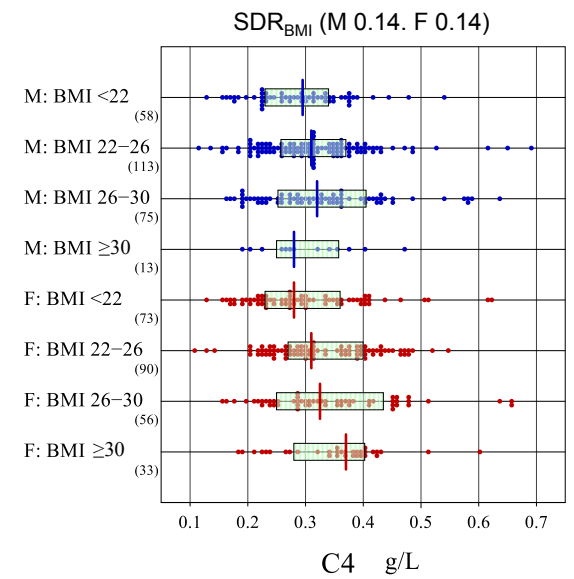

Supplement: Supplementary file 1 [file cclm-2018-0152_suppl.zip]
