# Supplementary material for: Reference intervals for 33 biochemical analytes in healthy Indian population: C-RIDL IFCC initiative
Source: publisher site journal article supplement (doi:10.1515/cclm-2018-0152), 2018-08-03
Supplement: Supplementary file 1 [file cclm-2018-0152_suppl.zip]

## Sheet: RIs for age18-65 in SI units
SI units				Males+Females								Males								Females
Analytes	Unit	Method	LAVE	N	LL-L	LL-H	LL	Me	UL	UL-L	UL-H	N	LL-L	LL-H	LL	Me	UL	UL-L	UL-H	N	LL-L	LL-H	LL	Me	UL	UL-L	UL-H
TP	g/L	NP	LAVE(-)	494	66	69	68	76	87	85	89	247	67	70	68	76	88	85	91	247	66	69	68	75	87	84	89
		P	LAVE(-)	492	67	69	68	76	86	85	88	246	67	70	69	76	88	86	89	245	66	69	68	75	85	82	87
		NP	LAVE(+)	399	67	70	69	75	86	84	88	202	67	70	69	76	87	84	89	205	67	70	69	75	87	84	90
		P	LAVE(+)	398	68	69	69	75	86	85	88	201	68	70	69	76	87	85	89	203	68	70	69	75	85	83	87
Alb	g/L	NP	LAVE(-)	495	36	37	36	42	50	49	51	248	37	39	38	44	51	50	52	247	35	37	36	40	47	46	49
		P	LAVE(-)	494	36	37	36	42	50	49	51	248	38	38	38	44	52	51	53	246	35	36	36	41	47	46	48
		NP	LAVE(+)	409	36	37	37	42	51	50	52	210	37	39	38	44	51	50	53	208	35	37	36	40	47	46	49
		P	LAVE(+)	408	36	37	36	42	51	50	52	210	38	39	38	44	52	51	52	207	35	36	36	41	48	46	49
Glu	mmol/L	NP	LAVE(-)	495	4.07	4.15	4.11	4.72	5.81	5.65	5.97	249	4.18	4.32	4.25	4.8	5.85	5.62	6.09	246	3.98	4.14	4.06	4.63	5.78	5.56	6.01
		P	LAVE(-)	490	4.11	4.22	4.17	4.72	5.68	5.55	5.81	247	4.18	4.28	4.23	4.79	5.66	5.52	5.8	244	4.03	4.17	4.1	4.65	5.66	5.51	5.81
		NP	LAVE(+)	407	4.06	4.17	4.11	4.73	5.77	5.59	5.95	208	4.18	4.32	4.25	4.82	5.9	5.44	6.35	210	4	4.16	4.08	4.63	5.77	5.56	5.98
		P	LAVE(+)	404	4.12	4.22	4.17	4.73	5.67	5.54	5.8	206	4.19	4.28	4.23	4.8	5.69	5.5	5.88	208	4.04	4.2	4.12	4.65	5.63	5.46	5.79
TC	mmol/L	NP	LAVE(-)	493	2.42	3.03	2.73	4.62	6.58	6.34	6.82	248	2.3	3.03	2.66	4.59	6.47	6.13	6.8	245	2.45	3.19	2.82	4.64	6.59	6.31	6.87
		P	LAVE(-)	493	2.8	3.03	2.91	4.6	6.49	6.33	6.64	248	2.72	3.12	2.92	4.63	6.39	6.22	6.56	245	2.72	3.03	2.88	4.57	6.58	6.32	6.85
		NP	LAVE(+)	399	2.34	2.91	2.62	4.62	6.55	6.28	6.82	202	2.19	3.29	2.74	4.64	6.62	6.2	7.03	204	2.29	3.14	2.72	4.6	6.66	6.43	6.89
		P	LAVE(+)	399	2.76	2.98	2.87	4.62	6.49	6.32	6.66	202	2.73	3.3	3.01	4.69	6.53	6.29	6.77	204	2.68	3.03	2.86	4.57	6.62	6.35	6.9
HDLC	mmol/L	NP	LAVE(-)	496	0.67	0.73	0.7	1.07	1.7	1.58	1.81	249	0.64	0.71	0.68	1	1.45	1.39	1.5	247	0.71	0.82	0.76	1.14	1.83	1.74	1.92
		P	LAVE(-)	495	0.68	0.74	0.71	1.06	1.67	1.6	1.74	249	0.66	0.72	0.69	0.99	1.47	1.42	1.52	247	0.73	0.81	0.77	1.14	1.84	1.72	1.96
		NP	LAVE(+)	401	0.67	0.73	0.7	1.06	1.64	1.55	1.74	203	0.63	0.71	0.67	1.01	1.44	1.35	1.52	205	0.69	0.81	0.75	1.13	1.82	1.75	1.9
		P	LAVE(+)	400	0.69	0.73	0.71	1.05	1.65	1.58	1.73	203	0.66	0.71	0.68	0.98	1.47	1.4	1.53	204	0.72	0.81	0.77	1.13	1.84	1.73	1.96
LDLC	mmol/L	NP	LAVE(-)	486	1.48	1.74	1.61	2.81	4.23	4.09	4.37	244	1.39	1.96	1.67	2.83	4.15	3.96	4.34	242	1.44	1.74	1.59	2.81	4.24	4	4.49
		P	LAVE(-)	486	1.56	1.76	1.66	2.81	4.35	4.22	4.47	243	1.6	2.01	1.81	2.85	4.38	4.11	4.64	242	1.49	1.72	1.6	2.75	4.39	4.15	4.63
		NP	LAVE(+)	393	1.45	1.74	1.6	2.87	4.23	4.04	4.41	198	1.44	2.03	1.74	2.87	4.2	4.02	4.37	201	1.51	1.87	1.69	2.8	4.22	3.96	4.47
		P	LAVE(+)	393	1.54	1.77	1.66	2.85	4.36	4.22	4.5	197	1.61	2.07	1.84	2.9	4.39	4.21	4.58	201	1.56	1.78	1.67	2.76	4.45	4.18	4.71
TG	mmol/L	NP	LAVE(-)	487	0.45	0.52	0.48	1.07	2.39	2.27	2.52	242	0.48	0.66	0.57	1.21	2.52	2.35	2.69	245	0.43	0.52	0.48	0.96	2.07	1.83	2.31
		P	LAVE(-)	487	0.47	0.52	0.49	1.08	2.42	2.29	2.55	241	0.52	0.67	0.6	1.23	2.66	2.42	2.9	245	0.44	0.5	0.47	0.96	2.1	1.95	2.26
		NP	LAVE(+)	402	0.46	0.53	0.5	1.09	2.38	2.25	2.5	201	0.52	0.69	0.6	1.24	2.51	2.33	2.69	205	0.41	0.53	0.47	0.97	2.06	1.83	2.3
		P	LAVE(+)	402	0.48	0.54	0.51	1.1	2.41	2.26	2.56	200	0.53	0.69	0.61	1.24	2.63	2.38	2.88	205	0.43	0.51	0.47	0.95	2.07	1.9	2.25
Cre	μmol/L	NP	LAVE(-)	495	39	49	44	68	92	88	96	249	48	63	56	75	96	92	101	246	33	44	38	57	75	71	79
		P	LAVE(-)	494	38	42	40	66	93	91	96	247	55	60	58	76	95	93	98	244	24	46	35	57	74	69	80
		NP	LAVE(+)	399	38	48	43	68	92	87	98	203	52	64	58	75	97	93	101	204	32	44	38	56	75	70	81
		P	LAVE(+)	397	38	42	40	67	93	91	95	201	55	62	59	76	97	93	101	202	26	47	36	56	74	69	79
Urea	mmol/L	NP	LAVE(-)	497	2	2.3	2.2	3.6	6.4	5.9	6.8	250	2	2.5	2.2	3.7	6.6	6	7.2	247	1.8	2.4	2.1	3.3	5.9	5.2	6.6
		P	LAVE(-)	496	2	2.2	2.1	3.6	5.9	5.7	6.2	249	2	2.4	2.2	3.8	6	5.5	6.5	247	2	2.1	2	3.3	5.8	5.4	6.2
		NP	LAVE(+)	401	2.1	2.3	2.2	3.6	6.3	5.7	6.9	204	2	2.6	2.3	3.9	6.8	6.2	7.3	205	1.8	2.4	2.1	3.3	5.8	5.2	6.3
		P	LAVE(+)	400	2	2.2	2.1	3.6	6	5.6	6.3	203	2	2.6	2.3	3.9	6.1	5.6	6.6	205	1.9	2.1	2	3.3	5.9	5.4	6.4
UA	μmol/L	NP	LAVE(-)	496	158	185	171	317	491	475	506	249	219	269	244	370	515	486	544	247	134	174	154	267	408	385	431
		P	LAVE(-)	496	164	185	174	317	501	486	517	248	233	262	248	371	509	493	525	247	145	172	159	268	404	381	427
		NP	LAVE(+)	409	177	205	191	320	490	471	510	210	229	276	252	369	512	484	540	209	143	182	162	269	396	384	409
		P	LAVE(+)	408	175	205	190	321	497	480	514	210	239	275	257	372	509	493	526	209	155	177	166	269	387	368	406
AST	U/L	NP	LAVE(-)	495	17	17	17	26	50	47	52	249	17	22	19	29	53	50	57	246	16	17	17	24	40	38	42
		P	LAVE(-)	492	17	18	18	26	47	44	50	247	18	21	20	28	53	49	57	246	16	17	17	24	39	36	41
		NP	LAVE(+)	420	16	19	17	25	49	46	52	207	20	22	21	29	54	50	58	211	16	18	17	23	38	32	43
		P	LAVE(+)	417	17	19	18	26	46	43	49	206	19	22	21	29	53	48	58	210	16	17	17	24	35	32	38
ALT	U/L	NP	LAVE(-)	478	9	13	11	23	69	64	73	233	12	15	14	30	72	68	76	245	7	12	10	19	47	41	54
		P	LAVE(-)	471	11	13	12	24	64	59	68	231	13	17	15	31	74	67	81	241	8	12	10	20	37	32	43
		NP	LAVE(+)	406	12	14	13	24	67	59	74	192	16	18	17	31	73	69	77	212	8	12	10	19	39	31	47
		P	LAVE(+)	402	12	14	13	25	61	56	66	191	16	19	17	31	75	67	82	210	9	12	10	19	34	29	38
LDH	U/L	NP	LAVE(-)	496	101	106	104	141	205	194	217	249	103	111	107	143	208	195	222	247	99	104	102	138	201	191	211
		P	LAVE(-)	495	101	107	104	142	206	200	213	248	104	113	109	144	203	197	210	246	98	106	102	139	209	201	217
		NP	LAVE(+)	411	102	107	105	141	206	194	217	208	103	112	107	145	205	190	219	207	98	103	101	136	202	189	215
		P	LAVE(+)	411	103	108	106	142	206	198	214	207	104	116	110	145	202	191	212	206	98	107	102	137	207	197	217
ALP	U/L	NP	LAVE(-)	496	34	42	38	67	111	106	116	250	39	43	41	68	111	105	116	246	29	42	35	66	112	105	119
		P	LAVE(-)	494	35	41	38	67	107	103	111	250	39	43	41	67	111	105	117	244	31	41	36	66	107	100	115
		NP	LAVE(+)	400	39	42	41	67	108	104	113	204	39	44	41	68	108	103	113	204	31	44	37	66	114	97	130
		P	LAVE(+)	400	40	42	41	66	109	106	113	204	39	44	42	67	108	103	113	201	32	42	37	66	103	97	109
GGT	U/L	NP	LAVE(-)	494	12	13	12	23	58	54	63	248	12	14	13	26	63	58	69	246	11	13	12	19	45	35	54
		P	LAVE(-)	492	11	13	12	23	54	48	59	246	12	15	14	27	62	55	68	243	11	12	11	20	40	35	46
		NP	LAVE(+)	412	12	14	13	23	59	54	64	208	12	15	14	26	64	59	70	207	11	13	12	19	42	32	53
		P	LAVE(+)	410	12	13	12	23	53	48	58	206	13	16	14	28	64	57	71	204	10	12	11	20	37	33	42
CK	U/L	NP	LAVE(-)	493	37	42	40	96	328	250	406	247	47	52	49	118	381	297	465	246	33	40	37	76	227	174	280
		P	LAVE(-)	489	35	43	39	97	268	222	314	245	42	55	48	122	304	243	364	242	31	40	36	78	184	158	210
		NP	LAVE(+)	409	38	45	41	97	301	250	352	207	46	62	54	122	365	275	456	213	33	41	37	74	229	185	273
		P	LAVE(+)	406	37	45	41	99	268	232	303	205	48	59	53	125	296	244	347	210	32	41	37	77	188	161	215
AMY	U/L	NP	LAVE(-)	493	33	37	35	73	138	131	145	249	25	43	34	75	141	131	150	244	34	37	35	72	130	109	151
		P	LAVE(-)	492	32	40	36	74	135	127	142	246	31	47	39	76	142	132	152	244	30	38	34	72	124	113	134
		NP	LAVE(+)	398	32	38	35	73	138	131	144	203	24	43	34	76	143	133	153	203	34	36	35	72	132	113	151
		P	LAVE(+)	397	32	41	37	74	136	128	144	201	31	45	38	77	144	136	153	202	29	39	34	73	122	109	135
TBil	μmol/L	NP	LAVE(-)	496	4	7	6	15	33	30	36	249	7	10	9	17	36	33	40	247	4	6	5	12	26	23	30
		P	LAVE(-)	492	5	7	6	15	29	26	32	248	6	10	8	17	33	29	37	245	5	6	6	12	25	23	27
		NP	LAVE(+)	400	5	8	6	15	33	28	38	204	8	10	9	17	35	31	39	205	5	5	5	11	24	21	27
		P	LAVE(+)	396	5	7	6	15	29	26	32	203	7	9	8	17	31	27	34	203	5	6	6	12	24	22	26
Na	mmol/L	NP	LAVE(-)	494	134.9	135.9	135.4	141.1	148.6	146.3	150.8	249	135.2	136.6	135.9	141.5	149.2	144.7	153.7	245	134.2	135.8	135	140.6	149.4	147.4	151.3
		P	LAVE(-)	485	134.5	135.5	135	141	145.7	145.2	146.3	244	135	136.2	135.6	141.4	145.7	145.1	146.4	241	134	135.5	134.7	140.6	146	144.4	147.5
		NP	LAVE(+)	399	135	135.9	135.5	141.1	149.3	146.8	151.7	203	135.4	136.6	136	141.6	147.9	144.5	151.3	203	134.1	135.5	134.8	140.4	150.2	148.1	152.4
		P	LAVE(+)	391	134.5	135.6	135.1	141	145.8	145	146.7	200	134.9	136.3	135.6	141.4	145.8	145.1	146.6	199	133.6	135.4	134.5	140.4	146.1	144.2	148.1
K	mmol/L	NP	LAVE(-)	497	3.7	3.8	3.8	4.4	5	5	5.1	250	3.6	3.8	3.7	4.4	5.1	5	5.2	247	3.6	3.9	3.8	4.3	5	4.9	5.1
		P	LAVE(-)	497	3.7	3.9	3.8	4.4	5	5	5.1	250	3.7	3.9	3.8	4.4	5.1	5	5.1	246	3.7	3.9	3.8	4.3	5	4.9	5.1
		NP	LAVE(+)	401	3.6	3.9	3.7	4.4	5.1	5	5.1	204	3.6	3.9	3.7	4.4	5.1	5	5.2	205	3.8	4	3.9	4.3	5	4.9	5.2
		P	LAVE(+)	401	3.7	3.9	3.8	4.4	5	5	5.1	204	3.7	3.9	3.8	4.4	5.1	5	5.2	204	3.8	4	3.9	4.3	5	4.9	5.1
Cl	mmol/L	NP	LAVE(-)	494	101.7	102.5	102.1	106.5	114.1	112.9	115.4	249	101.5	102.4	101.9	106.1	113.3	111.6	115.1	245	101.4	103.5	102.5	107.1	114.7	112.9	116.5
		P	LAVE(-)	489	101.8	102.8	102.3	106.7	112.5	111.4	113.7	247	101.2	102.7	101.9	106.2	111.9	110.6	113.3	242	101.6	103.4	102.5	107.2	113.1	111.7	114.4
		NP	LAVE(+)	398	101.8	102.8	102.3	106.6	114	112.4	115.6	203	101.2	102.4	101.8	106.2	112.6	111.2	114	203	100.8	104	102.4	106.9	115	113.2	116.8
		P	LAVE(+)	395	102	102.8	102.4	106.7	112.7	111.4	114	201	101.2	102.6	101.9	106.3	111.5	110.3	112.7	200	101.6	103.6	102.6	107.1	113.3	111.6	114.9
Ca	mmol/L	NP	LAVE(-)	497	2.08	2.11	2.1	2.25	2.45	2.42	2.49	250	2.09	2.13	2.11	2.27	2.49	2.44	2.53	247	2.06	2.11	2.09	2.23	2.4	2.37	2.43
		P	LAVE(-)	495	2.08	2.11	2.1	2.25	2.44	2.41	2.47	250	2.09	2.14	2.11	2.27	2.48	2.44	2.51	246	2.06	2.11	2.08	2.23	2.4	2.37	2.44
		NP	LAVE(+)	401	2.08	2.11	2.09	2.25	2.44	2.42	2.47	204	2.08	2.14	2.11	2.26	2.48	2.43	2.52	205	2.06	2.11	2.09	2.23	2.4	2.37	2.43
		P	LAVE(+)	400	2.09	2.12	2.1	2.25	2.44	2.41	2.46	203	2.1	2.14	2.12	2.27	2.47	2.44	2.51	205	2.06	2.1	2.08	2.23	2.39	2.37	2.41
IP	mmol/L	NP	LAVE(-)	496	0.73	0.82	0.77	1.1	1.43	1.39	1.47	250	0.71	0.84	0.77	1.09	1.42	1.35	1.49	246	0.7	0.88	0.79	1.12	1.42	1.38	1.47
		P	LAVE(-)	495	0.77	0.83	0.8	1.11	1.43	1.4	1.45	250	0.73	0.84	0.79	1.09	1.41	1.36	1.45	246	0.76	0.88	0.82	1.13	1.44	1.4	1.47
		NP	LAVE(+)	400	0.74	0.83	0.79	1.1	1.43	1.38	1.47	204	0.69	0.84	0.77	1.09	1.38	1.32	1.45	204	0.75	0.89	0.82	1.12	1.42	1.37	1.48
		P	LAVE(+)	399	0.76	0.85	0.8	1.11	1.42	1.39	1.45	203	0.72	0.85	0.79	1.1	1.39	1.35	1.44	204	0.78	0.9	0.84	1.12	1.43	1.38	1.48
Mg	mmol/L	NP	LAVE(-)	495	0.75	0.77	0.76	0.88	1.08	1.04	1.12	248	0.76	0.79	0.78	0.88	1.09	1.04	1.14	247	0.72	0.77	0.74	0.87	1.06	1.01	1.11
		P	LAVE(-)	492	0.75	0.78	0.77	0.88	1.07	1.03	1.1	247	0.76	0.8	0.78	0.89	1.06	1.02	1.1	244	0.72	0.79	0.75	0.87	1.06	1	1.12
		NP	LAVE(+)	400	0.75	0.78	0.76	0.88	1.07	1.02	1.13	202	0.76	0.79	0.78	0.89	1.06	1.01	1.11	205	0.74	0.77	0.76	0.87	1.06	0.99	1.14
		P	LAVE(+)	398	0.76	0.78	0.77	0.88	1.07	1.04	1.09	201	0.76	0.79	0.78	0.89	1.04	1.01	1.08	203	0.73	0.78	0.76	0.87	1.05	1	1.1
Fe	μmol/L	NP	LAVE(-)	495	3	5	4	15	30	28	33	248	4	9	7	18	34	32	37	247	2	5	4	12	25	23	26
		P	LAVE(-)	495	3	5	4	15	31	29	33	248	5	8	7	18	33	31	34	247	3	4	4	12	26	25	28
		NP	LAVE(+)	399	3	5	4	15	29	27	30	202	4	9	7	18	32	29	35	205	2	4	3	12	25	23	26
		P	LAVE(+)	399	3	5	4	15	29	28	31	201	6	8	7	18	32	30	34	205	3	4	4	11	27	25	29
TRF	g/L	NP	LAVE(-)	487	2.17	2.25	2.21	2.96	3.99	3.85	4.13	245	2.08	2.24	2.16	2.86	3.76	3.68	3.85	242	2.2	2.31	2.25	3.04	4.15	4.05	4.24
		P	LAVE(-)	487	2.16	2.25	2.21	2.96	4.03	3.93	4.12	245	2.12	2.22	2.17	2.86	3.89	3.76	4.03	242	2.22	2.36	2.29	3.06	4.15	4.06	4.25
		NP	LAVE(+)	392	2.13	2.23	2.18	2.96	3.98	3.81	4.15	200	2.12	2.3	2.21	2.88	3.76	3.67	3.86	200	2.19	2.37	2.28	3.07	4.14	3.96	4.31
		P	LAVE(+)	392	2.15	2.23	2.19	2.96	4.04	3.93	4.15	200	2.19	2.28	2.23	2.89	3.93	3.81	4.05	200	2.24	2.38	2.31	3.08	4.19	4.05	4.33
hsCRP	mg/L	NP	LAVE(-)	492	0.28	0.35	0.31	2.45	10.79	9.25	12.34	249	0.24	0.42	0.33	1.94	7.34	6.03	8.65	243	0.23	0.46	0.35	3.04	11.9	10.82	12.98
		P	LAVE(-)	492	0.18	0.51	0.35	2.23	12.24	10.39	14.08	249	0.33	0.38	0.36	1.72	9.63	8.02	11.23	243	0.22	0.47	0.34	2.92	13.14	11.09	15.18
		NP	LAVE(+)	406	0.24	0.4	0.32	2.5	10.35	8.5	12.19	207	0.23	0.42	0.32	2.05	7.84	5.46	10.22	207	0.2	0.54	0.37	3	10.97	9.46	12.47
		P	LAVE(+)	406	0.23	0.49	0.36	2.27	12.08	10.22	13.93	207	0.3	0.43	0.37	1.89	9.64	8.08	11.21	207	0.2	0.55	0.38	2.9	12.22	10.14	14.3
Ig G	g/L	NP	LAVE(-)	497	8.26	9.08	8.67	14.09	20.24	19.57	20.9	250	7.92	9.41	8.66	13.94	19.96	19.2	20.72	247	8.34	10.05	9.2	14.42	21.05	19.7	22.41
		P	LAVE(-)	495	8.74	9.48	9.11	14.17	20.4	19.85	20.96	250	8.4	9.76	9.08	13.88	20.22	19.51	20.94	246	8.83	10.13	9.48	14.56	20.9	20.12	21.68
		NP	LAVE(+)	401	8.08	9.67	8.88	14.08	20.42	19.76	21.08	204	7.9	9.62	8.76	13.87	19.84	18.94	20.75	205	9.31	11.13	10.22	14.56	20.81	19.3	22.32
		P	LAVE(+)	399	8.86	9.83	9.35	14.19	20.72	20.04	21.4	204	8.44	9.75	9.09	13.82	20.34	19.39	21.3	204	9.79	10.83	10.31	14.59	21.17	20.36	21.97
Ig A	g/L	NP	LAVE(-)	495	0.84	0.99	0.92	2.17	4.64	4.25	5.04	250	0.72	1.07	0.89	2.14	4.91	4.44	5.38	245	0.81	1.08	0.95	2.17	4.28	3.8	4.76
		P	LAVE(-)	493	0.84	1.03	0.94	2.18	4.35	4.05	4.64	249	0.8	1.09	0.94	2.12	4.58	4.18	4.97	245	0.9	1.07	0.98	2.2	4.2	3.84	4.56
		NP	LAVE(+)	399	0.87	0.98	0.93	2.18	4.79	4.22	5.36	204	0.74	1.04	0.89	2.13	4.79	4.3	5.28	203	0.89	1.23	1.06	2.24	4.41	3.8	5.03
		P	LAVE(+)	398	0.81	1.06	0.93	2.19	4.5	4.19	4.82	204	0.71	1.05	0.88	2.12	4.53	4.14	4.92	203	0.98	1.2	1.09	2.26	4.27	3.89	4.64
Ig M	g/L	NP	LAVE(-)	497	0.36	0.46	0.41	1.18	2.89	2.56	3.22	250	0.36	0.42	0.39	1.04	2.72	2.29	3.15	247	0.39	0.59	0.49	1.32	3.06	2.83	3.29
		P	LAVE(-)	497	0.38	0.46	0.42	1.16	2.82	2.6	3.03	250	0.36	0.43	0.4	1.03	2.54	2.31	2.78	246	0.43	0.58	0.51	1.3	3.1	2.78	3.41
		NP	LAVE(+)	401	0.34	0.46	0.4	1.16	2.92	2.59	3.24	204	0.37	0.49	0.43	1.07	2.78	2.16	3.4	205	0.44	0.57	0.51	1.32	3.02	2.65	3.38
		P	LAVE(+)	400	0.38	0.48	0.43	1.13	2.81	2.58	3.05	203	0.4	0.47	0.44	1.03	2.51	2.15	2.88	205	0.44	0.59	0.51	1.3	3.06	2.76	3.36
C3	g/L	NP	LAVE(-)	493	0.79	0.89	0.84	1.28	1.85	1.83	1.87	248	0.73	0.93	0.83	1.25	1.81	1.74	1.89	245	0.74	0.9	0.82	1.34	1.86	1.83	1.89
		P	LAVE(-)	491	0.8	0.91	0.85	1.3	1.82	1.77	1.87	247	0.8	0.92	0.86	1.26	1.77	1.7	1.83	245	0.77	0.92	0.84	1.35	1.84	1.78	1.9
		NP	LAVE(+)	397	0.81	0.91	0.86	1.3	1.83	1.78	1.88	203	0.81	0.94	0.88	1.26	1.83	1.75	1.91	204	0.75	0.94	0.84	1.34	1.83	1.78	1.89
		P	LAVE(+)	395	0.84	0.93	0.89	1.31	1.8	1.76	1.84	202	0.83	0.97	0.9	1.28	1.78	1.71	1.85	203	0.8	1.01	0.91	1.35	1.82	1.76	1.88
C4	g/L	NP	LAVE(-)	497	0.15	0.17	0.16	0.31	0.58	0.52	0.63	250	0.15	0.18	0.16	0.31	0.57	0.52	0.62	247	0.14	0.18	0.16	0.31	0.56	0.49	0.63
		P	LAVE(-)	497	0.15	0.17	0.16	0.31	0.55	0.53	0.58	250	0.14	0.18	0.16	0.3	0.53	0.49	0.58	247	0.15	0.18	0.16	0.32	0.57	0.53	0.6
		NP	LAVE(+)	401	0.15	0.17	0.16	0.31	0.57	0.51	0.62	204	0.14	0.18	0.16	0.31	0.56	0.51	0.61	205	0.15	0.19	0.17	0.31	0.56	0.48	0.64
		P	LAVE(+)	401	0.16	0.18	0.17	0.31	0.56	0.53	0.58	204	0.14	0.17	0.15	0.31	0.53	0.48	0.57	204	0.15	0.2	0.18	0.31	0.57	0.53	0.61
TTR	mg/L	NP	LAVE(-)	495	130.07	147.63	138.85	222	354.42	340.93	367.91	250	139.66	185.22	162.44	258	374.06	357.91	390.21	245	124.48	143.82	134.15	195	285.44	267.81	303.07
		P	LAVE(-)	494	131.76	146.4	139.08	223.13	350.06	339.55	360.57	249	143.5	178.86	161.18	257.04	360.13	346.59	373.67	244	127.91	138.97	133.44	194.89	277.63	263.12	292.14
		NP	LAVE(+)	399	134.97	147.57	141.27	223	350.9	333.73	368.07	204	140.27	189.69	164.98	261	371.78	350.89	392.67	204	124.38	139.78	132.08	196	276.48	258.94	294.02
		P	LAVE(+)	398	131.91	148.63	140.27	224.46	349.48	334.07	364.89	203	152.64	183.54	168.09	258.51	363.07	344.38	381.76	204	128.12	139.74	133.93	195.62	276.59	264.17	289.01

## Sheet: RIs for age18-65 in conv units
Conventional units				Males+Females								Males								Females
Analytes	Unit	Method	LAVE	N	LL-L	LL-H	LL	Me	UL	UL-L	UL-H	N	LL-L	LL-H	LL	Me	UL	UL-L	UL-H	N	LL-L	LL-H	LL	Me	UL	UL-L	UL-H
TP	g/dL	NP	LAVE(-)	493	6.7	6.9	6.8	7.6	8.7	8.4	8.9	247	6.7	7	6.8	7.6	8.8	8.5	9	246	6.7	6.9	6.8	7.5	8.6	8.4	8.9
		P	LAVE(-)	492	6.7	6.9	6.8	7.6	8.7	8.5	8.8	247	6.7	7	6.9	7.6	8.8	8.6	8.9	245	6.7	6.9	6.8	7.5	8.5	8.3	8.7
		NP	LAVE(+)	401	6.7	7	6.8	7.5	8.6	8.4	8.8	201	6.7	7	6.9	7.6	8.7	8.4	8.9	200	6.8	7	6.9	7.5	8.6	8.3	9
		P	LAVE(+)	400	6.8	6.9	6.9	7.6	8.6	8.5	8.7	201	6.8	7	6.9	7.6	8.8	8.6	8.9	199	6.8	6.9	6.8	7.5	8.6	8.3	8.8
Alb	g/dL	NP	LAVE(-)	494	3.6	3.7	3.6	4.2	5	4.9	5.1	248	3.7	3.9	3.8	4.4	5.1	5	5.3	246	3.5	3.7	3.6	4	4.7	4.6	4.8
		P	LAVE(-)	493	3.6	3.7	3.6	4.2	5	5	5.1	248	3.7	3.8	3.8	4.4	5.2	5	5.3	245	3.5	3.6	3.6	4	4.7	4.6	4.8
		NP	LAVE(+)	412	3.6	3.7	3.7	4.2	5	5	5.1	209	3.7	3.9	3.8	4.4	5.1	5	5.3	203	3.4	3.7	3.6	4	4.7	4.6	4.9
		P	LAVE(+)	411	3.6	3.7	3.6	4.2	5.1	5	5.1	209	3.8	3.9	3.8	4.4	5.2	5	5.3	202	3.5	3.7	3.6	4	4.8	4.6	4.9
Glu	mg/dL	NP	LAVE(-)	494	73	75	74	85	104	102	107	249	75	78	77	86	105	101	108	245	71	75	73	83	103	99	107
		P	LAVE(-)	490	74	76	75	85	101	100	103	247	74	78	76	86	101	98	104	243	72	75	74	84	101	99	104
		NP	LAVE(+)	410	73	75	74	86	105	101	108	208	75	78	76	87	105	99	110	203	72	76	74	83	104	98	110
		P	LAVE(+)	407	73	76	75	85	101	99	104	206	75	77	76	87	101	99	104	201	72	75	74	84	101	97	104
TC	mg/dL	NP	LAVE(-)	492	90	118	104	178	253	244	263	248	89	116	102	178	252	240	264	244	94	125	109	179	256	245	267
		P	LAVE(-)	492	107	117	112	178	250	244	256	248	107	122	115	179	250	242	258	244	103	119	111	177	253	242	264
		NP	LAVE(+)	401	89	109	99	179	254	246	261	202	82	125	104	179	255	241	269	199	93	118	106	179	252	239	266
		P	LAVE(+)	401	106	114	110	179	251	245	258	202	104	129	117	180	254	244	263	199	102	117	109	176	252	242	262
HDLC	mg/dL	NP	LAVE(-)	495	26	29	27	41	65	61	69	249	25	27	26	39	56	54	58	246	28	31	30	44	70	67	74
		P	LAVE(-)	493	26	29	27	41	64	61	67	249	26	27	26	38	57	55	59	245	28	31	30	44	70	65	76
		NP	LAVE(+)	403	26	28	27	41	62	60	64	202	24	27	26	39	55	52	59	200	27	31	29	44	70	64	76
		P	LAVE(+)	402	26	29	27	41	63	60	65	202	25	27	26	38	56	54	59	199	27	31	29	44	70	64	76
LDLC	mg/dL	NP	LAVE(-)	485	57	68	63	109	163	156	169	244	56	77	66	109	162	155	169	241	55	67	61	108	164	156	171
		P	LAVE(-)	485	61	68	64	109	167	162	171	243	61	79	70	111	167	161	173	241	57	65	61	107	168	162	174
		NP	LAVE(+)	395	56	70	63	111	163	155	170	198	57	76	67	111	164	157	172	196	55	70	63	109	161	151	170
		P	LAVE(+)	395	59	68	64	110	167	163	172	197	63	77	70	112	170	164	176	196	57	67	62	108	166	161	172
TG	mg/dL	NP	LAVE(-)	486	40	46	43	95	213	199	226	242	38	56	47	107	222	210	234	244	37	45	41	86	180	160	200
		P	LAVE(-)	485	41	47	44	96	215	205	225	241	44	59	52	109	233	218	248	243	36	44	40	85	179	160	199
		NP	LAVE(+)	404	41	47	44	96	211	199	224	198	42	63	53	110	226	206	245	202	35	46	40	86	185	167	202
		P	LAVE(+)	404	42	48	45	97	214	201	228	197	48	64	56	110	234	216	253	202	37	44	41	85	183	165	202
Cre	mg/dL	NP	LAVE(-)	494	0.44	0.55	0.5	0.77	1.05	0.99	1.1	249	0.56	0.73	0.64	0.85	1.09	1.05	1.14	245	0.37	0.48	0.42	0.65	0.85	0.81	0.89
		P	LAVE(-)	493	0.46	0.49	0.47	0.74	1.1	1.07	1.13	247	0.63	0.69	0.66	0.86	1.09	1.05	1.13	243	0.36	0.45	0.4	0.64	0.83	0.79	0.87
		NP	LAVE(+)	401	0.42	0.56	0.49	0.77	1.04	1	1.08	202	0.59	0.73	0.66	0.85	1.11	1.07	1.15	199	0.39	0.48	0.43	0.63	0.83	0.77	0.9
		P	LAVE(+)	400	0.45	0.49	0.47	0.74	1.09	1.05	1.13	200	0.62	0.7	0.66	0.86	1.11	1.06	1.16	198	0.36	0.49	0.42	0.63	0.84	0.78	0.9
Urea	mg/dL	NP	LAVE(-)	496	5	6	6	10	17	16	19	250	6	7	6	10	18	16	20	246	5	7	6	9	17	15	18
		P	LAVE(-)	495	5	6	6	10	16	15	17	249	5	7	6	11	17	15	18	246	5	6	6	9	16	15	17
		NP	LAVE(+)	403	6	6	6	10	18	17	19	203	5	7	6	11	18	17	20	200	5	7	6	9	16	14	18
		P	LAVE(+)	402	5	6	6	10	17	16	18	202	6	7	6	11	17	15	18	200	5	6	6	9	16	15	18
UA	mg/dL	NP	LAVE(-)	495	2.6	3.2	2.9	5.3	8.2	7.9	8.4	249	3.5	4.5	4	6.2	8.6	8.1	9.1	246	2.3	2.8	2.5	4.5	6.9	6.4	7.4
		P	LAVE(-)	495	2.8	3.1	2.9	5.3	8.4	8.1	8.7	248	3.8	4.5	4.1	6.2	8.6	8.3	8.9	246	2.5	2.9	2.7	4.5	6.8	6.4	7.1
		NP	LAVE(+)	410	2.9	3.5	3.2	5.4	8.2	7.9	8.5	209	3.8	4.7	4.3	6.2	8.6	8.1	9	207	2.4	3.1	2.8	4.5	6.7	6.4	6.9
		P	LAVE(+)	409	3	3.4	3.2	5.4	8.4	8.1	8.7	209	4	4.8	4.4	6.3	8.6	8.3	8.9	206	2.6	3.1	2.8	4.5	6.5	6.2	6.8
AST	U/L	NP	LAVE(-)	494	17	18	17	26	50	48	52	249	17	21	19	29	54	50	57	245	16	18	17	23	40	36	43
		P	LAVE(-)	492	17	18	18	26	47	44	50	246	19	21	20	29	53	49	57	244	16	17	17	24	38	35	41
		NP	LAVE(+)	420	17	18	17	26	49	46	52	206	20	22	21	29	54	49	59	206	16	18	17	23	37	32	43
		P	LAVE(+)	417	18	19	18	26	45	42	48	205	19	21	20	29	53	47	58	205	16	17	17	24	35	32	39
ALT	U/L	NP	LAVE(-)	477	9	13	11	23	68	63	73	233	13	16	14	30	73	70	76	244	7	12	10	19	46	39	53
		P	LAVE(-)	471	11	13	12	24	64	59	68	231	13	17	15	31	75	68	81	240	8	11	10	20	37	33	41
		NP	LAVE(+)	412	12	14	13	24	68	62	74	191	15	18	17	31	73	68	78	208	8	12	10	19	39	32	47
		P	LAVE(+)	408	12	14	13	24	61	56	66	189	16	19	17	31	75	67	83	206	8	12	10	20	34	29	39
LDH	U/L	NP	LAVE(-)	495	100	106	103	141	205	195	216	249	102	111	106	143	208	192	225	246	99	105	102	139	203	190	215
		P	LAVE(-)	494	100	108	104	142	205	200	211	248	103	113	108	144	203	193	214	245	99	106	102	139	209	201	217
		NP	LAVE(+)	411	102	107	105	141	205	194	217	208	103	111	107	144	206	193	219	203	98	106	102	137	200	192	208
		P	LAVE(+)	410	103	110	106	141	206	199	212	207	104	115	109	145	201	191	210	202	98	108	103	138	206	196	216
ALP	U/L	NP	LAVE(-)	495	35	42	38	67	111	107	116	250	39	43	41	67	110	104	116	245	29	40	35	65	111	104	117
		P	LAVE(-)	492	35	41	38	67	107	103	112	250	39	43	41	67	110	104	116	243	31	41	36	65	106	99	112
		NP	LAVE(+)	402	39	43	41	67	108	103	113	203	38	43	40	68	107	100	113	199	29	45	37	66	111	102	120
		P	LAVE(+)	402	40	42	41	66	108	104	113	203	39	43	41	67	107	102	113	198	30	44	37	66	105	96	114
GGT	U/L	NP	LAVE(-)	493	12	13	12	23	59	54	64	248	12	14	13	25	62	58	66	245	11	13	12	20	47	35	58
		P	LAVE(-)	491	11	13	12	23	54	49	59	247	12	15	13	26	61	54	67	242	11	12	11	20	40	34	47
		NP	LAVE(+)	418	11	14	13	23	59	54	64	210	11	15	13	26	64	58	70	203	11	13	12	19	42	33	51
		P	LAVE(+)	416	11	13	12	23	53	49	57	208	13	16	14	27	64	58	70	200	10	13	12	20	38	32	44
CK	U/L	NP	LAVE(-)	492	37	42	39	95	330	251	409	247	46	54	50	118	386	304	469	245	33	41	37	75	223	171	274
		P	LAVE(-)	488	35	42	39	97	270	221	318	246	43	56	50	122	315	265	364	241	33	40	36	77	181	161	202
		NP	LAVE(+)	409	38	44	41	98	299	255	342	205	48	66	57	121	360	280	440	208	32	41	37	75	231	170	291
		P	LAVE(+)	407	37	45	41	100	271	238	304	203	50	62	56	125	297	244	350	205	31	41	36	77	181	152	209
AMY	U/L	NP	LAVE(-)	493	34	37	35	73	138	131	145	249	30	41	35	76	139	129	149	244	34	36	35	71	132	113	150
		P	LAVE(-)	492	32	40	36	74	134	129	140	248	32	43	37	76	142	131	152	243	30	40	35	71	123	113	133
		NP	LAVE(+)	401	33	38	35	74	137	129	145	203	28	44	36	77	145	132	157	199	34	36	35	71	132	110	154
		P	LAVE(+)	400	32	41	36	75	134	127	141	201	31	48	40	77	146	135	157	198	30	39	34	72	124	114	134
TBil	mg/dL	NP	LAVE(-)	495	0.25	0.45	0.35	0.88	1.9	1.75	2.04	249	0.48	0.59	0.53	1.02	2.14	1.93	2.35	246	0.25	0.37	0.31	0.73	1.49	1.23	1.76
		P	LAVE(-)	492	0.33	0.39	0.36	0.85	1.73	1.59	1.86	248	0.46	0.57	0.52	1	1.95	1.76	2.14	245	0.29	0.37	0.33	0.71	1.45	1.31	1.59
		NP	LAVE(+)	402	0.27	0.49	0.38	0.87	1.92	1.72	2.12	203	0.49	0.58	0.53	1	2.17	1.96	2.38	200	0.26	0.35	0.3	0.68	1.44	1.18	1.7
		P	LAVE(+)	399	0.35	0.4	0.37	0.86	1.74	1.59	1.89	201	0.48	0.56	0.52	0.99	1.87	1.68	2.05	199	0.29	0.37	0.33	0.7	1.4	1.28	1.52
Na	mmol/L	NP	LAVE(-)	493	134.8	135.9	135.4	141.1	148.8	146.7	151	249	135.2	136.8	136	141.5	148.5	145	152	244	134.2	135.7	135	140.6	148.7	146.4	151
		P	LAVE(-)	484	134.6	135.5	135	141	145.8	145.2	146.5	244	134.9	136.3	135.6	141.4	145.8	145.3	146.3	240	133.9	135.5	134.7	140.6	145.8	144.7	146.9
		NP	LAVE(+)	401	134.8	135.9	135.4	141.1	149.4	147.2	151.5	202	135.1	136.7	135.9	141.6	149.4	145	153.8	198	134.2	135.4	134.8	140.5	150	147.7	152.4
		P	LAVE(+)	392	134.6	135.6	135.1	141	145.8	145.1	146.5	198	135	136.2	135.6	141.4	145.9	145.3	146.6	195	133.2	135.2	134.2	140.5	146.4	144.5	148.2
K	mmol/L	NP	LAVE(-)	496	3.7	3.8	3.8	4.4	5	5	5.1	250	3.6	3.9	3.8	4.4	5.1	5	5.2	246	3.7	3.9	3.8	4.3	5	5	5.1
		P	LAVE(-)	496	3.7	3.9	3.8	4.4	5	5	5.1	250	3.7	3.9	3.8	4.4	5.1	5	5.1	245	3.7	3.9	3.8	4.3	5	4.9	5
		NP	LAVE(+)	403	3.6	3.9	3.7	4.4	5.1	5	5.2	203	3.6	3.9	3.7	4.4	5.1	5	5.2	200	3.8	4	3.9	4.3	5	4.9	5.2
		P	LAVE(+)	402	3.7	3.9	3.8	4.4	5	5	5.1	203	3.7	3.9	3.8	4.4	5.1	5	5.2	199	3.8	4	3.9	4.3	5	4.9	5.1
Cl	mmol/L	NP	LAVE(-)	493	101.5	102.4	102	106.6	113.9	113	114.8	249	101.4	102.4	101.9	106.2	113.2	111.4	115	244	101.5	103.3	102.4	107	114.7	112.9	116.5
		P	LAVE(-)	488	101.7	102.8	102.2	106.7	112.4	111.3	113.6	247	101.3	102.6	101.9	106.2	111.9	110.5	113.4	241	101.6	103.2	102.4	107.1	112.8	111.2	114.3
		NP	LAVE(+)	400	101.5	102.7	102.1	106.5	114.3	112.6	116.1	202	101.4	102.3	101.9	106.2	113.2	110.9	115.6	198	101.1	103.8	102.5	107	115.4	112.4	118.4
		P	LAVE(+)	396	101.9	102.7	102.3	106.7	112.6	111.4	113.8	201	101.3	102.6	101.9	106.3	112	110.5	113.5	196	101.9	103.9	102.9	107.2	114	111.9	116.2
Ca	mg/dL	NP	LAVE(-)	496	8.32	8.44	8.38	8.99	9.83	9.71	9.96	250	8.35	8.53	8.44	9.07	9.95	9.83	10.07	246	8.24	8.45	8.34	8.91	9.59	9.47	9.72
		P	LAVE(-)	494	8.31	8.43	8.37	8.99	9.73	9.64	9.82	249	8.39	8.54	8.47	9.07	9.89	9.76	10.03	245	8.24	8.41	8.33	8.92	9.57	9.48	9.65
		NP	LAVE(+)	403	8.31	8.47	8.39	9	9.78	9.64	9.91	203	8.29	8.59	8.44	9.07	9.92	9.77	10.07	200	8.25	8.43	8.34	8.92	9.59	9.47	9.71
		P	LAVE(+)	402	8.37	8.47	8.42	9	9.73	9.63	9.84	202	8.39	8.56	8.48	9.08	9.88	9.75	10.01	200	8.25	8.41	8.33	8.92	9.56	9.47	9.65
IP	mg/dL	NP	LAVE(-)	495	2.3	2.6	2.4	3.4	4.4	4.3	4.5	250	2.2	2.6	2.4	3.4	4.4	4.1	4.6	245	2.2	2.7	2.5	3.5	4.4	4.3	4.5
		P	LAVE(-)	494	2.4	2.6	2.5	3.4	4.4	4.3	4.5	250	2.3	2.6	2.4	3.4	4.4	4.2	4.5	245	2.4	2.8	2.6	3.5	4.5	4.4	4.6
		NP	LAVE(+)	402	2.3	2.6	2.4	3.4	4.4	4.3	4.5	203	2.2	2.6	2.4	3.4	4.3	4	4.6	199	2.4	2.7	2.6	3.5	4.4	4.2	4.5
		P	LAVE(+)	401	2.4	2.6	2.5	3.4	4.4	4.3	4.5	203	2.3	2.6	2.4	3.4	4.3	4.2	4.5	199	2.4	2.8	2.6	3.5	4.4	4.3	4.6
Mg	mg/dL	NP	LAVE(-)	494	1.82	1.87	1.85	2.13	2.61	2.51	2.71	248	1.84	1.93	1.89	2.15	2.64	2.51	2.77	246	1.78	1.87	1.82	2.12	2.59	2.47	2.71
		P	LAVE(-)	490	1.82	1.89	1.86	2.13	2.53	2.46	2.6	247	1.86	1.93	1.9	2.15	2.56	2.48	2.65	243	1.79	1.88	1.83	2.11	2.5	2.41	2.6
		NP	LAVE(+)	402	1.82	1.89	1.85	2.14	2.59	2.48	2.71	201	1.84	1.92	1.88	2.16	2.58	2.47	2.69	200	1.76	1.88	1.82	2.11	2.58	2.28	2.87
		P	LAVE(+)	399	1.83	1.89	1.86	2.14	2.53	2.47	2.59	200	1.87	1.91	1.89	2.16	2.54	2.46	2.62	198	1.78	1.87	1.83	2.1	2.51	2.4	2.63
Fe	μg/dL	NP	LAVE(-)	494	17	28	23	84	168	155	182	248	26	48	37	99	192	173	211	246	13	24	19	67	139	131	147
		P	LAVE(-)	494	19	25	22	83	170	161	179	248	29	47	38	100	183	170	196	246	16	22	19	65	146	139	154
		NP	LAVE(+)	401	15	30	22	84	163	150	176	201	27	52	40	98	181	161	201	200	12	24	18	66	139	128	150
		P	LAVE(+)	401	18	27	22	83	164	155	174	201	33	50	41	98	179	168	191	200	16	22	19	65	148	137	159
TRF	mg/dL	NP	LAVE(-)	486	216	225	220	296	398	384	412	245	210	225	218	285	378	368	388	241	217	236	226	303	415	402	427
		P	LAVE(-)	486	217	224	220	295	402	394	410	245	211	223	217	286	389	379	399	241	222	237	230	305	415	402	429
		NP	LAVE(+)	393	214	225	219	297	400	382	418	199	213	230	221	288	379	364	394	195	220	239	230	306	417	402	432
		P	LAVE(+)	393	215	226	220	297	406	395	416	199	216	228	222	289	393	378	407	195	228	240	234	306	423	410	436
hsCRP	mg/L	NP	LAVE(-)	491	0.03	0.03	0.03	0.25	1.08	0.95	1.22	249	0.03	0.04	0.03	0.2	0.74	0.6	0.89	242	0.02	0.04	0.03	0.31	1.17	1	1.34
		P	LAVE(-)	491	0.03	0.04	0.03	0.22	1.25	1.07	1.43	249	0.02	0.04	0.03	0.18	0.92	0.75	1.09	242	0.03	0.05	0.04	0.28	1.38	1.13	1.62
		NP	LAVE(+)	411	0.03	0.04	0.03	0.25	1.08	0.92	1.23	206	0.02	0.04	0.03	0.21	0.78	0.53	1.02	204	0.02	0.06	0.04	0.31	1.11	0.95	1.27
		P	LAVE(+)	411	0.03	0.04	0.04	0.22	1.24	1.1	1.39	206	0.03	0.04	0.04	0.19	0.95	0.78	1.12	204	0.03	0.05	0.04	0.29	1.21	1.05	1.37
Ig G	g/dL	NP	LAVE(-)	496	819	960	890	1410	2017	1940	2095	250	791	945	868	1387	1998	1924	2072	246	812	1015	913	1440	2067	1913	2221
		P	LAVE(-)	495	871	952	911	1420	2033	1966	2100	250	835	955	895	1384	2012	1958	2066	245	852	1008	930	1451	2068	1972	2164
		NP	LAVE(+)	403	816	961	888	1404	2040	1977	2102	203	793	924	859	1379	1984	1909	2058	200	882	1130	1006	1434	2074	1892	2257
		P	LAVE(+)	402	876	965	921	1419	2062	1997	2128	203	820	944	882	1382	2018	1953	2083	199	937	1071	1004	1452	2096	2027	2164
Ig A	g/dL	NP	LAVE(-)	494	81	102	91	215	466	421	510	250	71	101	86	213	497	443	552	244	82	103	93	219	442	391	494
		P	LAVE(-)	493	80	99	90	218	431	404	459	250	72	99	85	215	449	417	480	243	84	104	94	222	416	379	453
		NP	LAVE(+)	401	82	103	93	217	478	436	520	203	75	101	88	213	482	420	543	198	89	123	106	224	435	369	502
		P	LAVE(+)	400	77	101	89	219	436	408	464	203	70	100	85	212	445	404	486	197	91	120	106	226	423	378	469
Ig M	g/dL	NP	LAVE(-)	496	36	47	41	118	296	265	327	250	36	42	39	104	269	226	313	246	41	57	49	133	306	274	338
		P	LAVE(-)	496	39	47	43	116	283	264	303	249	32	43	38	104	237	202	273	246	42	59	50	132	305	285	326
		NP	LAVE(+)	403	35	48	42	116	292	261	323	203	37	50	43	105	274	214	335	200	42	60	51	131	305	270	339
		P	LAVE(+)	402	40	49	44	115	280	258	302	201	36	46	41	104	232	195	268	200	45	60	53	130	306	277	335
C3	mg/dL	NP	LAVE(-)	492	79	88	83	129	185	182	188	248	78	91	85	125	181	173	188	244	77	89	83	135	187	183	190
		P	LAVE(-)	490	79	90	84	130	182	178	186	247	80	91	85	126	175	170	181	244	79	92	86	135	185	179	192
		NP	LAVE(+)	400	81	89	85	130	183	179	188	202	80	97	88	126	180	170	190	199	77	93	85	135	184	180	188
		P	LAVE(+)	398	84	92	88	132	180	176	184	201	84	96	90	128	176	169	183	198	85	99	92	136	183	177	189
C4	mg/dL	NP	LAVE(-)	496	15	17	16	31	58	54	62	250	15	17	16	30	57	53	62	246	13	18	16	32	57	50	65
		P	LAVE(-)	495	15	17	16	31	55	52	58	249	14	17	16	30	53	48	58	245	14	19	16	32	57	53	60
		NP	LAVE(+)	403	15	18	17	31	57	52	63	203	15	18	16	31	56	50	61	200	14	20	17	32	58	49	68
		P	LAVE(+)	403	15	18	16	31	55	52	58	202	13	17	15	31	51	47	55	199	15	20	17	32	56	51	60
TTR	mg/dL	NP	LAVE(-)	494	13	15	14	22	35	34	37	250	14	18	16	26	37	35	39	244	13	14	13	19	29	27	30
		P	LAVE(-)	492	13	15	14	22	35	34	36	249	14	18	16	26	36	34	38	243	13	14	13	19	28	26	29
		NP	LAVE(+)	402	13	15	14	22	35	33	37	203	15	18	17	26	38	36	40	199	12	14	13	20	28	26	30
		P	LAVE(+)	401	13	15	14	23	35	33	36	202	15	18	17	26	37	34	39	199	13	14	14	20	27	26	29

## Sheet: RIs 18-44 & 45-65 LAVE(-) SI
SI units		Males+Females				Males				Females
Item	Age_grp	n	LL	Me	UL	n	LL	Me	UL	n	LL	Me	UL
TP	18~45	320	69.08	76.13	87.36	165	69.28	77.01	88.1	155	68.95	75.26	85.67
TP	45~65	166	66.96	74.55	84.14	78	67.21	74.6	85	88	66.22	74.62	83.84
Alb	18~45	322	36.56	42.69	51.15	166	38.83	44.37	52.18	156	35.77	40.89	48.31
Alb	45~65	166	35.86	40.99	47.8	78	37	42.09	49.3	88	35.32	39.99	45.57
Glu	18~45	322	4.1116	4.6469	5.4507	168	4.2271	4.7335	5.5553	154	4.0246	4.5476	5.2379
Glu	45~65	164	4.3151	4.8793	6.0293	76	4.3527	4.8934	6.0257	88	4.3087	4.8342	6.0849
TC	18~45	322	3.0317	4.4402	6.0953	166	3.1139	4.4869	6.1508	156	2.9907	4.3566	6.0746
TC	45~65	165	2.7383	4.8993	6.9106	78	2.5156	4.8693	6.6523	87	2.7917	4.9429	7.0585
HDLC	18~45	324	0.7085	1.0397	1.6547	168	0.6921	0.9762	1.4839	156	0.7549	1.1137	1.8054
HDLC	45~65	165	0.729	1.0928	1.7256	77	0.6992	1.0046	1.47	89	0.816	1.173	1.9258
LDLC	18~45	321	1.6628	2.7212	4.2273	165	1.7654	2.8071	4.2884	156	1.6246	2.6035	4.3007
LDLC	45~65	159	1.7657	2.9755	4.5268	75	1.7926	2.9452	4.4088	84	1.7131	3.0203	4.5716
TG	18~45	321	0.4708	1.0156	2.3517	165	0.5737	1.1701	2.5827	156	0.4435	0.8569	2.054
TG	45~65	159	0.641	1.2106	2.5966	73	0.6427	1.3744	2.8115	87	0.6257	1.1077	2.2472
Cre	18~45	323	39.58	65.74	94.49	167	58.29	75.85	96.08	155	37.7	54.6	73.94
Cre	45~65	165	41.78	66.55	91.74	76	54.71	75.49	96	88	39.92	58.9	76.61
Urea	18~45	323	1.983	3.433	5.778	167	2.107	3.808	6.135	156	1.943	3.104	5.078
Urea	45~65	167	2.344	3.825	6.184	78	2.382	3.866	5.845	89	2.38	3.74	6.689
UA	18~45	324	166.9	312.42	500.68	168	263.46	371.04	508.13	156	146.76	256.03	371.4
UA	45~65	166	195.02	320.06	502.02	77	223.18	363.7	523.84	89	189.08	289.56	434.86
AST	18~45	322	17.25	26.18	46.58	166	19.57	29.04	52.77	156	16.42	23.83	36.39
AST	45~65	164	18.55	25.74	49.34	78	19.96	27.32	53.93	87	17.25	24.42	42.69
ALT	18~45	305	11.19	23.98	63.71	151	14.84	31.32	71.32	153	8.82	18.74	34.17
ALT	45~65	162	13.07	24.73	63.4	76	14.37	29.94	78.61	87	11.69	21.52	41.51
LDH	18~45	321	104.56	138.89	205.48	166	108.01	142.79	209.04	154	103.03	134.96	198.89
LDH	45~65	167	104.29	147.62	205.09	78	107.99	147.02	194.92	89	99.65	148.97	212.14
ALP	18~45	322	38.5	64.51	107.41	168	41.7	67.82	111.4	155	34.55	60.75	100.04
ALP	45~65	165	41.06	71.32	110.49	78	39.42	67.41	105.98	87	43.36	75.82	117.31
GGT	18~45	321	11.95	21.95	53.29	166	13.38	26.26	60.37	154	10.86	18.68	34.81
GGT	45~65	164	12.43	24.77	53.62	77	14.15	27.13	62.38	88	11.66	22.54	47.24
CK	18~45	318	40.66	96.27	254.79	165	58.44	123.04	316.73	155	37.91	74.35	180.54
CK	45~65	164	35.76	95.5	282.23	77	38.77	114.03	292.39	87	30.31	84.95	221.97
AMY	18~45	319	37.22	72.77	134.79	165	41.7	75.09	144.29	153	34.76	70.08	121.83
AMY	45~65	167	35.65	75.52	135.42	78	33.67	79.22	139.21	89	34.78	73.1	126.45
TBil	18~45	319	4.88	15.06	28.58	165	7.97	17.46	31.59	154	5.24	11.96	26.05
TBil	45~65	167	6.28	13.81	29.82	78	7.86	16.59	34.13	89	6.09	11.79	23.02
Na	18~45	318	134.953	140.75	146.233	164	135.498	141.372	146.13	154	134.495	140.04	145.954
Na	45~65	162	135.84	141.328	145.457	77	135.704	141.276	145.437	86	135.84	141.398	146.1
K	18~45	324	3.763	4.365	4.993	168	3.757	4.401	5.059	156	3.778	4.33	4.91
K	45~65	167	3.839	4.427	5.081	78	3.88	4.493	5.074	89	3.844	4.357	5.099
Cl	18~45	320	102.119	106.653	112.743	166	101.908	106.228	112.314	154	102.418	107.164	113.051
Cl	45~65	163	102.32	106.699	112.331	77	102.067	106.206	111.584	86	102.296	107.224	112.789
Ca	18~45	324	2.0978	2.2558	2.4487	168	2.1328	2.2865	2.4895	156	2.0796	2.2248	2.386
Ca	45~65	166	2.086	2.2391	2.4304	77	2.0456	2.2406	2.4064	88	2.0795	2.2441	2.4279
IP	18~45	322	0.8389	1.1078	1.4248	167	0.8352	1.1107	1.4221	156	0.8138	1.1049	1.4106
IP	45~65	166	0.7871	1.1137	1.4475	78	0.7443	1.0478	1.3924	88	0.8782	1.1635	1.4697
Mg	18~45	319	0.7651	0.8714	1.0699	166	0.7706	0.8825	1.0684	154	0.7478	0.8599	1.0374
Mg	45~65	167	0.7822	0.8837	1.0577	78	0.8048	0.8878	1.0403	89	0.7707	0.8781	1.0746
Fe	18~45	323	4.37	14.86	31.93	166	8.59	17.83	34.05	156	3.77	11.38	28.3
Fe	45~65	166	3.3	14.35	28.77	77	4.5	17.43	31.18	89	2.59	12.23	22.42
TRF	18~45	316	2.2628	2.9821	4.0925	165	2.2421	2.8638	3.9163	151	2.3451	3.1081	4.2555
TRF	45~65	165	2.1419	2.9063	3.955	76	2.0964	2.8321	3.9147	89	2.2365	2.9668	4.028
hsCRP	18~45	322	0.3281	1.9893	11.7954	167	0.3022	1.6832	9.5767	155	0.3068	2.4413	13.4136
hsCRP	45~65	164	0.4127	2.8529	12.3734	78	0.3817	1.881	10.6248	86	0.6431	3.8951	13.3415
Ig G	18~45	322	9.2999	14.1834	20.4386	168	9.1836	13.8012	20.2669	155	9.4302	14.5256	20.7187
Ig G	45~65	167	8.9434	14.2084	20.5696	78	8.3896	13.8177	19.846	89	9.3395	14.4188	21.0262
Ig A	18~45	321	0.979	2.0633	4.3644	167	0.8916	2.0172	4.5308	155	1.0164	2.0981	4.1383
Ig A	45~65	166	0.9229	2.3796	4.5184	78	0.8322	2.4239	4.5227	88	0.9779	2.3473	4.4195
Ig M	18~45	324	0.468	1.2314	2.8255	168	0.4405	1.0491	2.4855	156	0.5906	1.4342	3.0389
Ig M	45~65	167	0.3757	1.0217	2.7378	78	0.3665	0.9273	2.4415	89	0.4264	1.103	3.0126
C3	18~45	321	0.8433	1.2992	1.8214	166	0.8662	1.2831	1.7956	155	0.8185	1.3171	1.8586
C3	45~65	165	0.9126	1.3098	1.8178	77	0.8446	1.2269	1.7037	87	0.9904	1.3788	1.8619
C4	18~45	324	0.1643	0.3017	0.5252	168	0.1699	0.2995	0.5187	156	0.1634	0.3015	0.5362
C4	45~65	167	0.1536	0.328	0.5877	78	0.1296	0.3099	0.5598	89	0.1524	0.3498	0.5847
TTR	18~45	321	139.34	223.93	349.86	167	159.74	258.9	352.77	154	136.42	193.31	273.84
TTR	45~65	167	138.5	221.35	358.74	78	153.04	256.15	371.09	89	130.99	198.15	286.25

## Sheet: RIs 18-44 & 45-65 LAVE(-) Conv
Conv units		Males+Females				Males				Females
Item	Age_grp	n	LL	Me	UL	n	LL	Me	UL	n	LL	Me	UL
TP	18~45	320	6.908	7.613	8.736	165	6.928	7.701	8.81	155	6.895	7.526	8.567
TP	45~65	166	6.696	7.455	8.414	78	6.721	7.46	8.5	88	6.622	7.462	8.384
Alb	18~45	322	3.656	4.269	5.115	166	3.883	4.437	5.218	156	3.577	4.089	4.831
Alb	45~65	166	3.586	4.099	4.78	78	3.7	4.209	4.93	88	3.532	3.999	4.557
Glu	18~45	322	74.0026	83.6372	98.1044	168	76.0815	85.1959	99.9871	154	72.4368	81.85	94.2743
Glu	45~65	164	77.6653	87.8201	108.518	76	78.3421	88.0739	108.454	88	77.5501	87.0083	109.519
TC	18~45	322	117.326	171.834	235.886	166	120.507	173.642	238.034	156	115.739	168.599	235.085
TC	45~65	165	105.971	189.601	267.438	78	97.3529	188.44	257.442	87	108.038	191.289	273.162
HDLC	18~45	324	27.4187	40.2361	64.0364	168	26.7841	37.7786	57.4265	156	29.2144	43.0998	69.8684
HDLC	45~65	165	28.2121	42.291	66.7802	77	27.0588	38.8777	56.8885	89	31.5789	45.3947	74.5279
LDLC	18~45	321	64.3498	105.31	163.595	165	68.3204	108.634	165.96	156	62.8715	100.755	166.436
LDLC	45~65	159	68.332	115.151	175.186	75	69.3731	113.978	170.619	84	66.2964	116.885	176.92
TG	18~45	321	41.6637	89.8761	208.115	165	50.7699	103.549	228.558	156	39.2478	75.8319	181.77
TG	45~65	159	56.7257	107.133	229.788	73	56.8761	121.628	248.805	87	55.3717	98.0265	198.867
Cre	18~45	323	0.447214	0.742796	1.06764	167	0.658619	0.857029	1.08561	155	0.425972	0.616925	0.835448
Cre	45~65	165	0.472072	0.751948	1.03657	76	0.618168	0.852962	1.0847	88	0.451056	0.665511	0.865616
Urea	18~45	323	5.45785	9.44871	15.9029	167	5.79913	10.4808	16.8855	156	5.34775	8.5432	13.9763
Urea	45~65	167	6.45143	10.5276	17.0203	78	6.55602	10.6405	16.0873	89	6.55052	10.2937	18.4103
UA	18~45	324	2.8041	5.24899	8.41196	168	4.42641	6.23387	8.53713	156	2.46573	4.30158	6.23992
UA	45~65	166	3.27655	5.37735	8.43448	77	3.74966	6.11055	8.80108	89	3.17675	4.86492	7.30612
AST	18~45	322	17.25	26.18	46.58	166	19.57	29.04	52.77	156	16.42	23.83	36.39
AST	45~65	164	18.55	25.74	49.34	78	19.96	27.32	53.93	87	17.25	24.42	42.69
ALT	18~45	305	11.19	23.98	63.71	151	14.84	31.32	71.32	153	8.82	18.74	34.17
ALT	45~65	162	13.07	24.73	63.4	76	14.37	29.94	78.61	87	11.69	21.52	41.51
LDH	18~45	321	104.56	138.89	205.48	166	108.01	142.79	209.04	154	103.03	134.96	198.89
LDH	45~65	167	104.29	147.62	205.09	78	107.99	147.02	194.92	89	99.65	148.97	212.14
ALP	18~45	322	38.5	64.51	107.41	168	41.7	67.82	111.4	155	34.55	60.75	100.04
ALP	45~65	165	41.06	71.32	110.49	78	39.42	67.41	105.98	87	43.36	75.82	117.31
GGT	18~45	321	11.95	21.95	53.29	166	13.38	26.26	60.37	154	10.86	18.68	34.81
GGT	45~65	164	12.43	24.77	53.62	77	14.15	27.13	62.38	88	11.66	22.54	47.24
CK	18~45	318	40.66	96.27	254.79	165	58.44	123.04	316.73	155	37.91	74.35	180.54
CK	45~65	164	35.76	95.5	282.23	77	38.77	114.03	292.39	87	30.31	84.95	221.97
AMY	18~45	319	37.22	72.77	134.79	165	41.7	75.09	144.29	153	34.76	70.08	121.83
AMY	45~65	167	35.65	75.52	135.42	78	33.67	79.22	139.21	89	34.78	73.1	126.45
TBil	18~45	319	0.284992	0.879504	1.66907	165	0.465448	1.01966	1.84486	154	0.306016	0.698464	1.52132
TBil	45~65	167	0.366752	0.806504	1.74149	78	0.459024	0.968856	1.99319	89	0.355656	0.688536	1.34437
Na	18~45	318	134.953	140.75	146.233	164	135.498	141.372	146.13	154	134.495	140.04	145.954
Na	45~65	162	135.84	141.328	145.457	77	135.704	141.276	145.437	86	135.84	141.398	146.1
K	18~45	324	3.763	4.365	4.993	168	3.757	4.401	5.059	156	3.778	4.33	4.91
K	45~65	167	3.839	4.427	5.081	78	3.88	4.493	5.074	89	3.844	4.357	5.099
Cl	18~45	320	102.119	106.653	112.743	166	101.908	106.228	112.314	154	102.418	107.164	113.051
Cl	45~65	163	102.32	106.699	112.331	77	102.067	106.206	111.584	86	102.296	107.224	112.789
Ca	18~45	324	8.3912	9.0232	9.7948	168	8.5312	9.146	9.958	156	8.3184	8.8992	9.544
Ca	45~65	166	8.344	8.9564	9.7216	77	8.1824	8.9624	9.6256	88	8.318	8.9764	9.7116
IP	18~45	322	2.59721	3.42972	4.41114	167	2.58575	3.43869	4.40278	156	2.5195	3.42074	4.36718
IP	45~65	166	2.43684	3.44798	4.48142	78	2.30433	3.24396	4.31083	88	2.71888	3.60216	4.55015
Mg	18~45	319	1.85975	2.11813	2.60063	166	1.87312	2.14511	2.59699	154	1.8177	2.09018	2.52163
Mg	45~65	167	1.90131	2.14803	2.57098	78	1.95625	2.158	2.52868	89	1.87336	2.13442	2.61206
Fe	18~45	323	24.3848	82.9194	178.171	166	47.9325	99.4921	190	156	21.0368	63.5009	157.915
Fe	45~65	166	18.4141	80.0736	160.538	77	25.1102	97.2601	173.986	89	14.4523	68.2439	125.104
TRF	18~45	316	226.28	298.21	409.25	165	224.21	286.38	391.63	151	234.51	310.81	425.55
TRF	45~65	165	214.19	290.63	395.5	76	209.64	283.21	391.47	89	223.65	296.68	402.8
hsCRP	18~45	322	0.03281	0.19893	1.17954	167	0.03022	0.16832	0.95767	155	0.03068	0.24413	1.34136
hsCRP	45~65	164	0.04127	0.28529	1.23734	78	0.03817	0.1881	1.06248	86	0.06431	0.38951	1.33415
Ig G	18~45	322	929.99	1418.34	2043.86	168	918.36	1380.12	2026.69	155	943.02	1452.56	2071.87
Ig G	45~65	167	894.34	1420.84	2056.96	78	838.96	1381.77	1984.6	89	933.95	1441.88	2102.62
Ig A	18~45	321	97.9	206.33	436.44	167	89.16	201.72	453.08	155	101.64	209.81	413.83
Ig A	45~65	166	92.29	237.96	451.84	78	83.22	242.39	452.27	88	97.79	234.73	441.95
Ig M	18~45	324	46.8	123.14	282.55	168	44.05	104.91	248.55	156	59.06	143.42	303.89
Ig M	45~65	167	37.57	102.17	273.78	78	36.65	92.73	244.15	89	42.64	110.3	301.26
C3	18~45	321	84.33	129.92	182.14	166	86.62	128.31	179.56	155	81.85	131.71	185.86
C3	45~65	165	91.26	130.98	181.78	77	84.46	122.69	170.37	87	99.04	137.88	186.19
C4	18~45	324	16.43	30.17	52.52	168	16.99	29.95	51.87	156	16.34	30.15	53.62
C4	45~65	167	15.36	32.8	58.77	78	12.96	30.99	55.98	89	15.24	34.98	58.47
TTR	18~45	321	13.934	22.393	34.986	167	15.974	25.89	35.277	154	13.642	19.331	27.384
TTR	45~65	167	13.85	22.135	35.874	78	15.304	25.615	37.109	89	13.099	19.815	28.625
