# Supplementary figures and images for: Reference intervals for 33 biochemical analytes in healthy Indian population: C-RIDL IFCC initiative
Source: publisher site journal article supplement (doi:10.1515/cclm-2018-0152), 2018-08-03

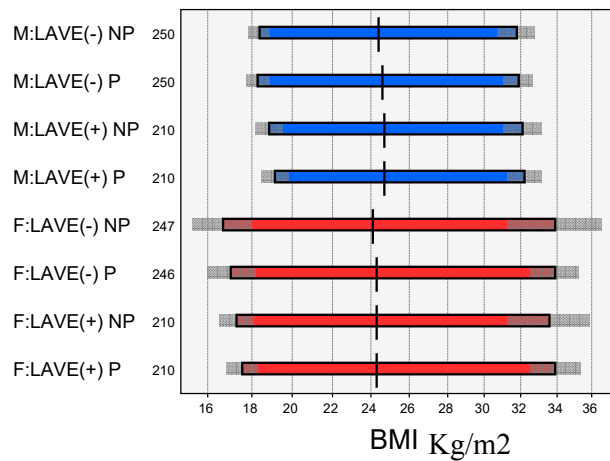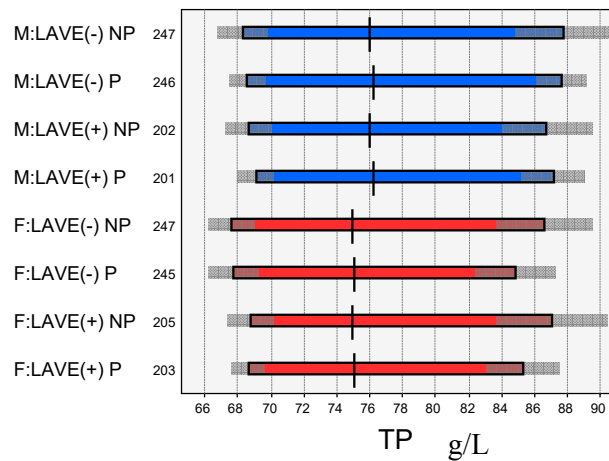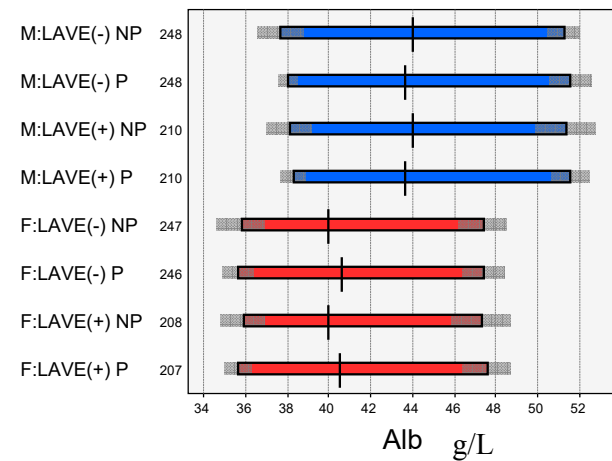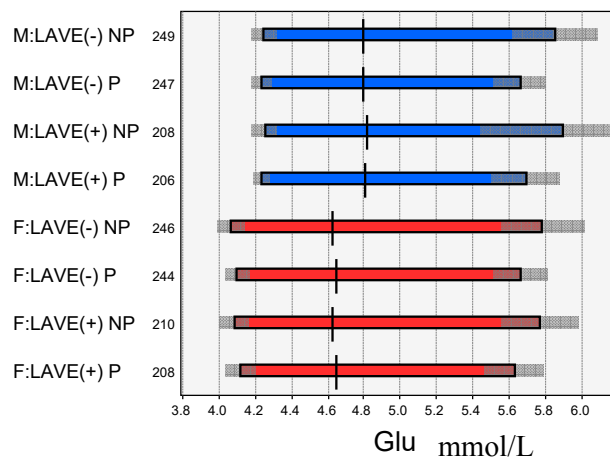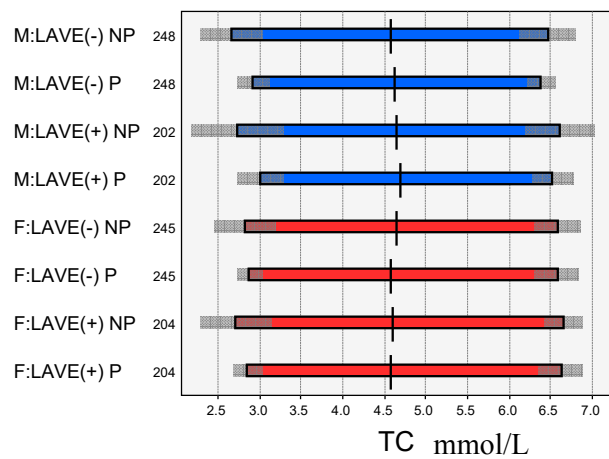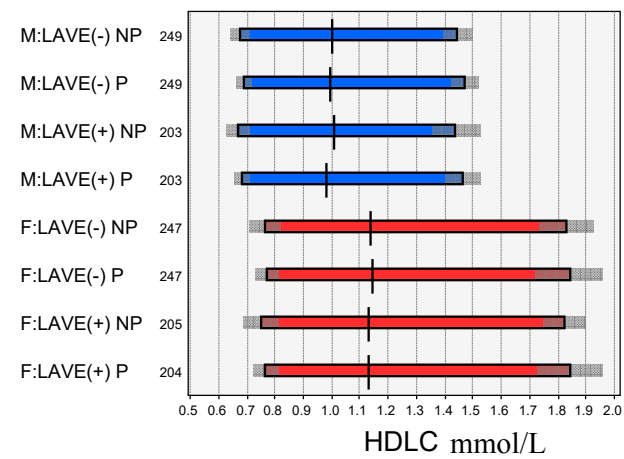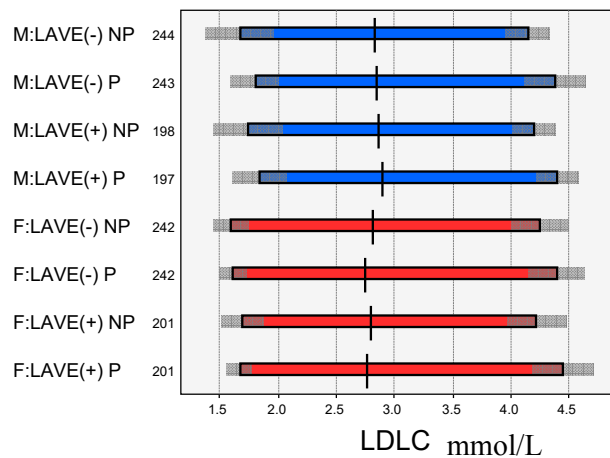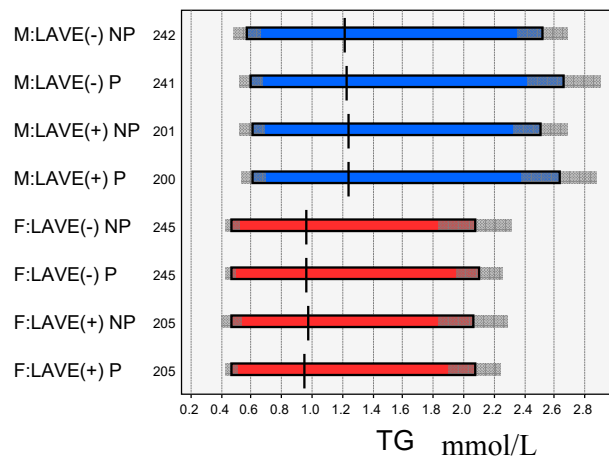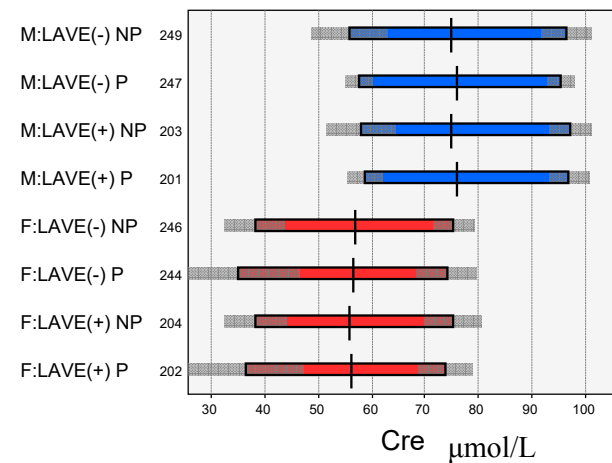

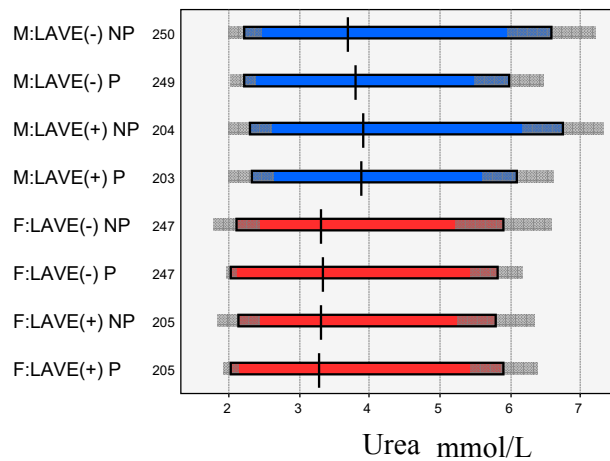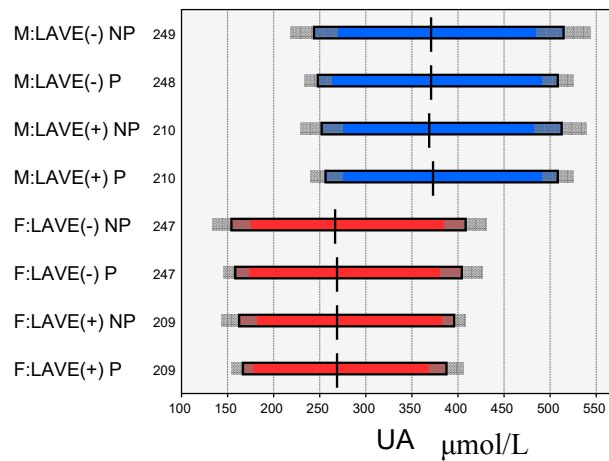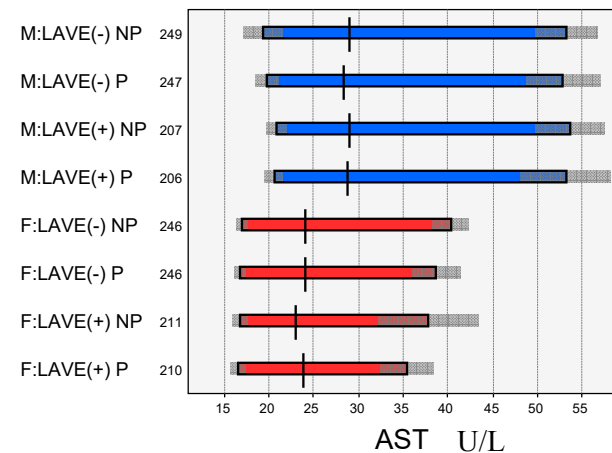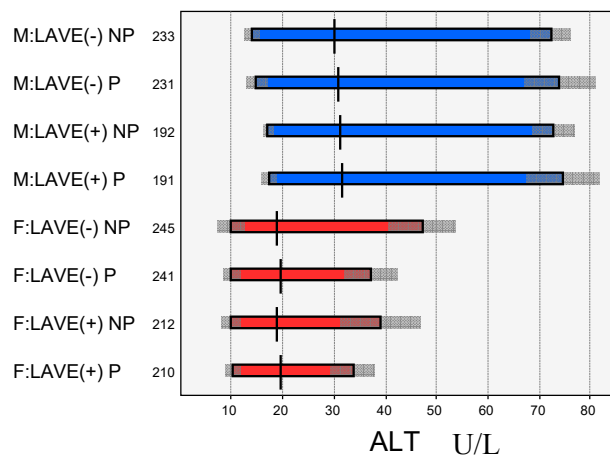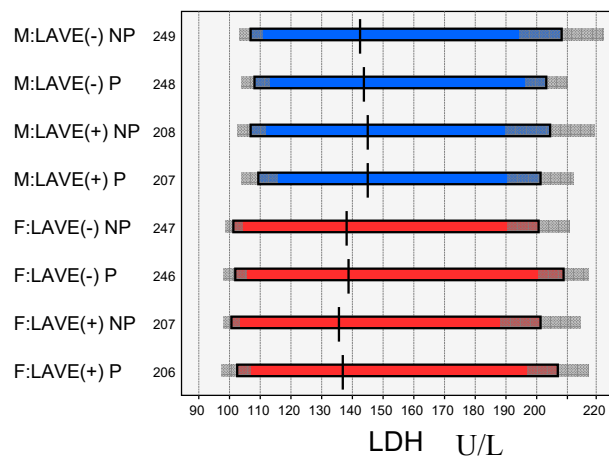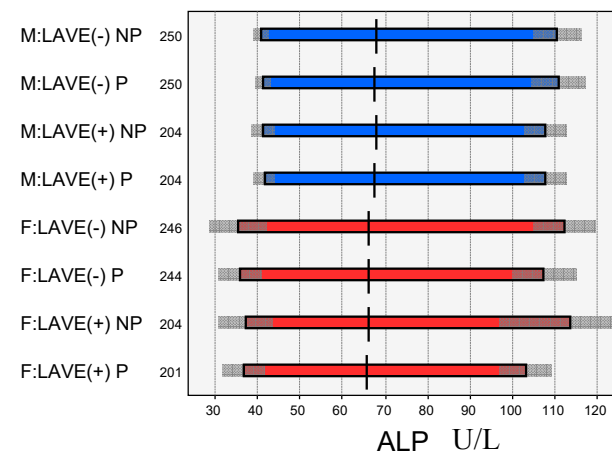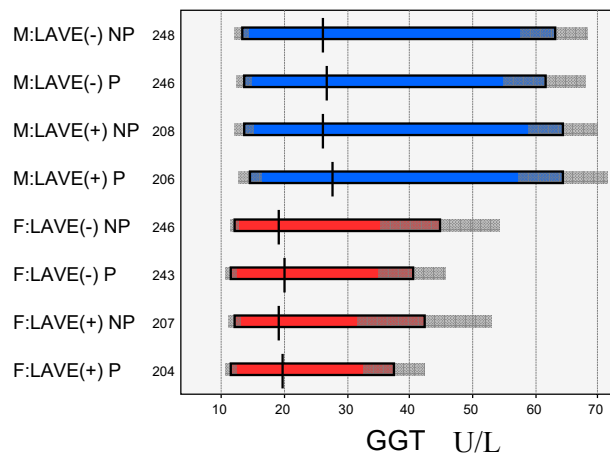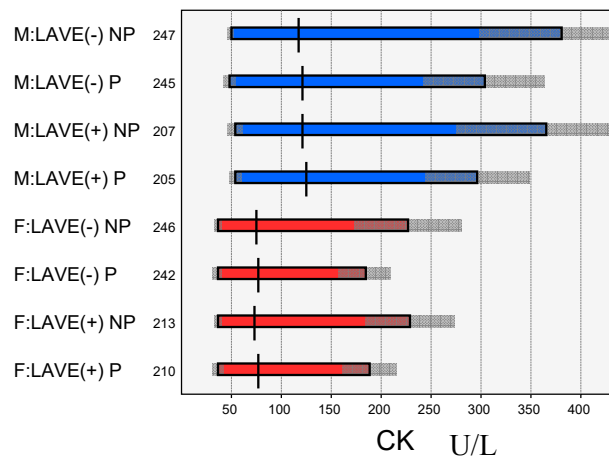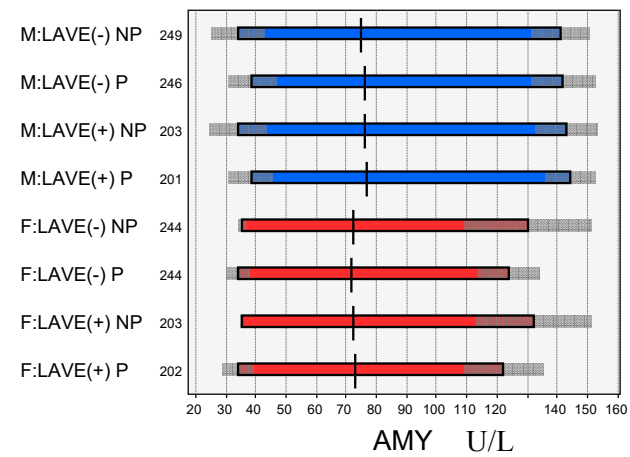

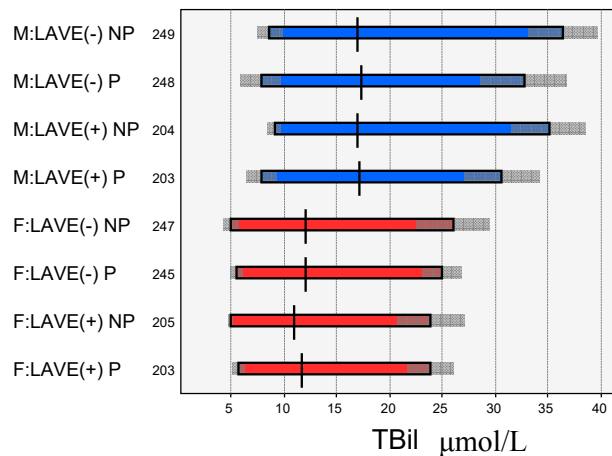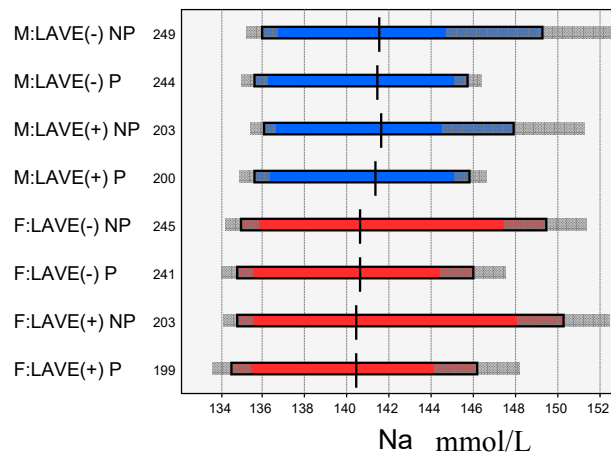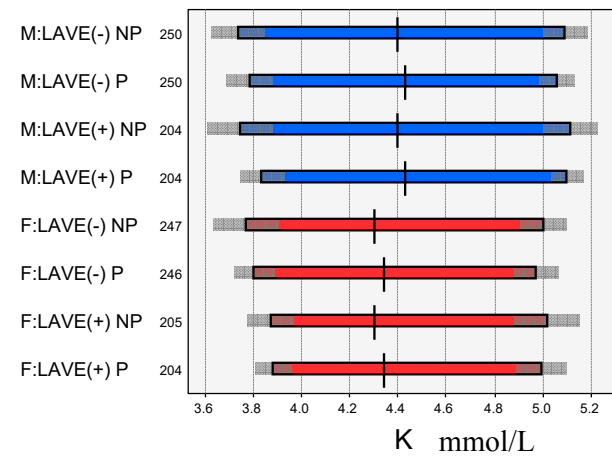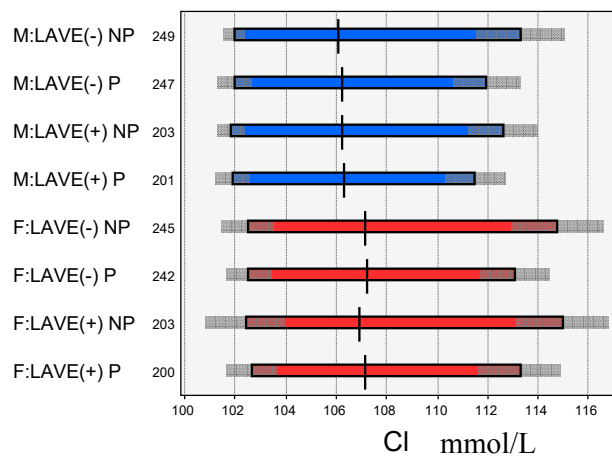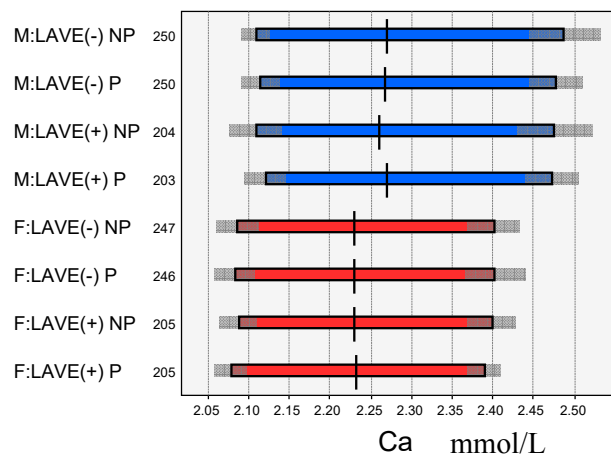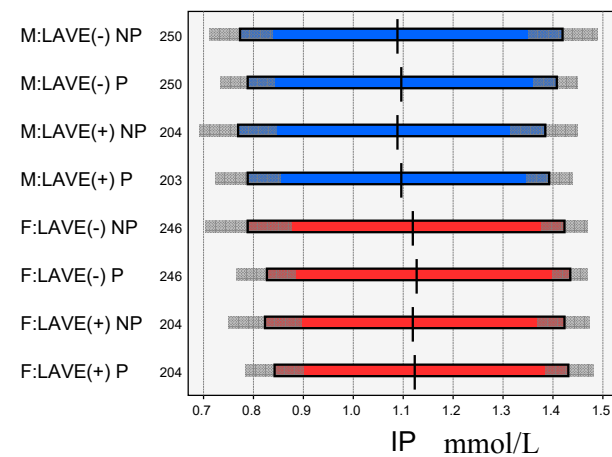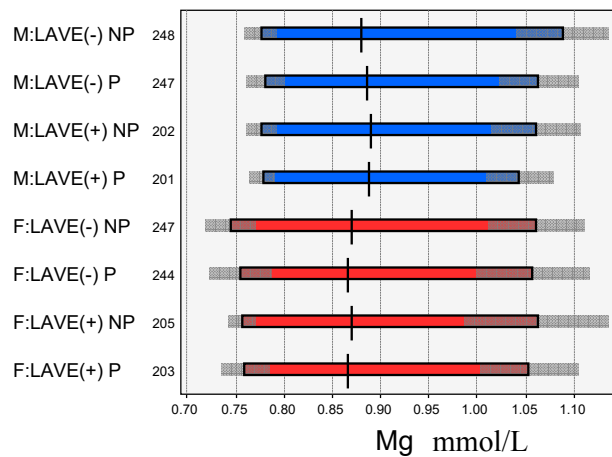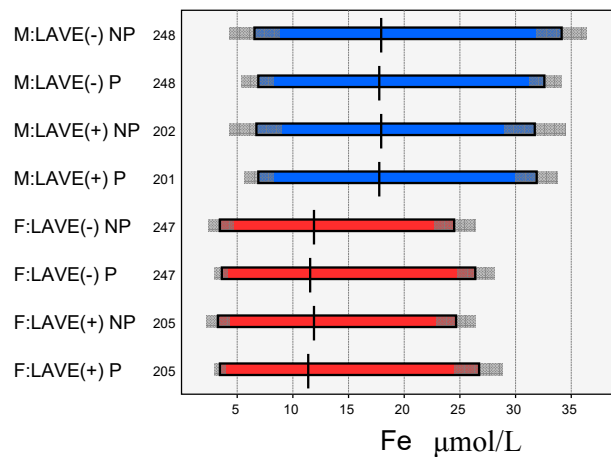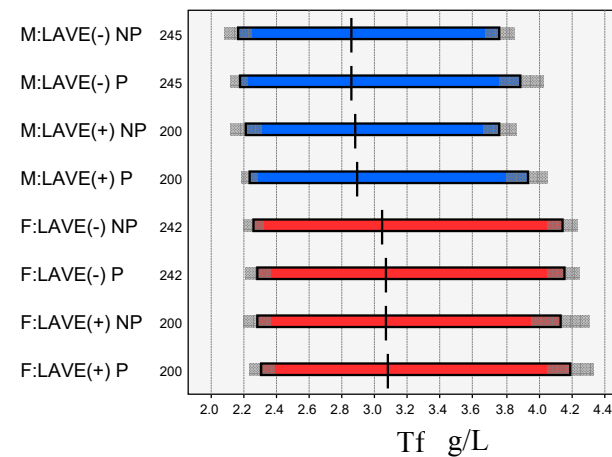

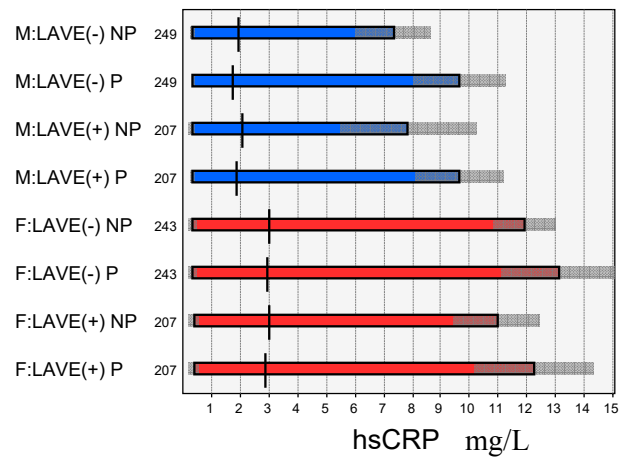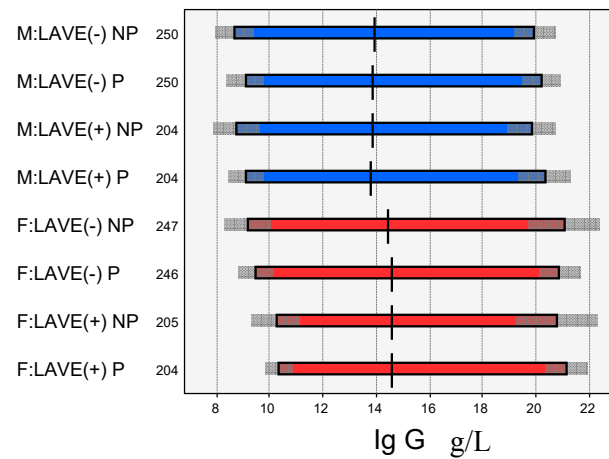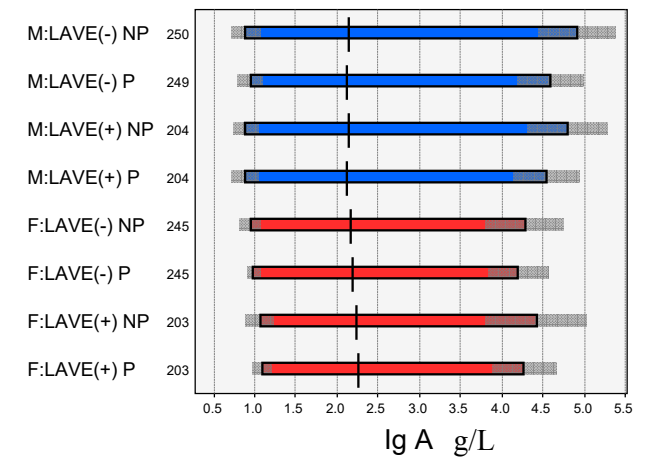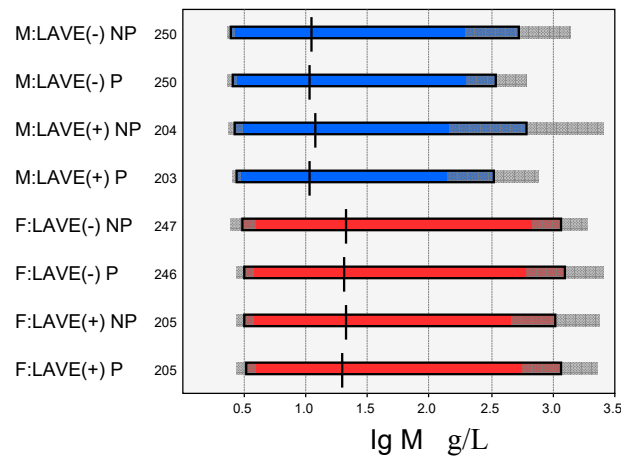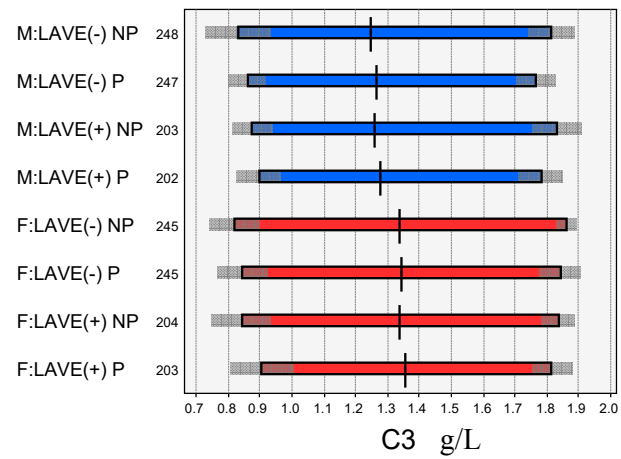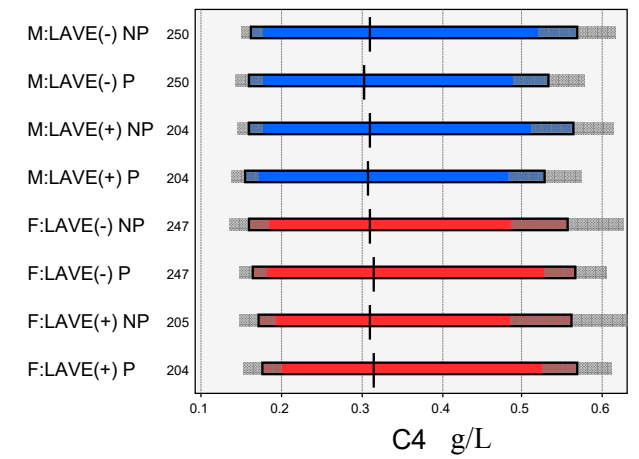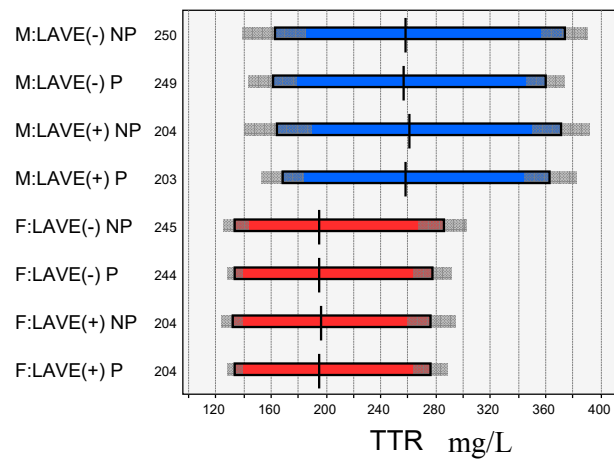

Supplement: Supplementary file 3 [file cclm-2018-0152_suppl.zip]
